# Supplementary material for: Let‐7a‐regulated translational readthrough of mammalian AGO1 generates a microRNA pathway inhibitor
Source: PubMed Central journal article supplement (PMC6694283; doi:10.15252/embj.2018100727), 2019-07-22
Supplement: EMBJ-38-e100727-s001.pdf [file EMBJ-38-e100727-s001.pdf]

# Appendix

## Table of contents

1. Appendix Figure S1 to S5
2. Legends to Appendix Supplementary Figures
3. Appendix Table S1 to S3

# Appendix Figure S1

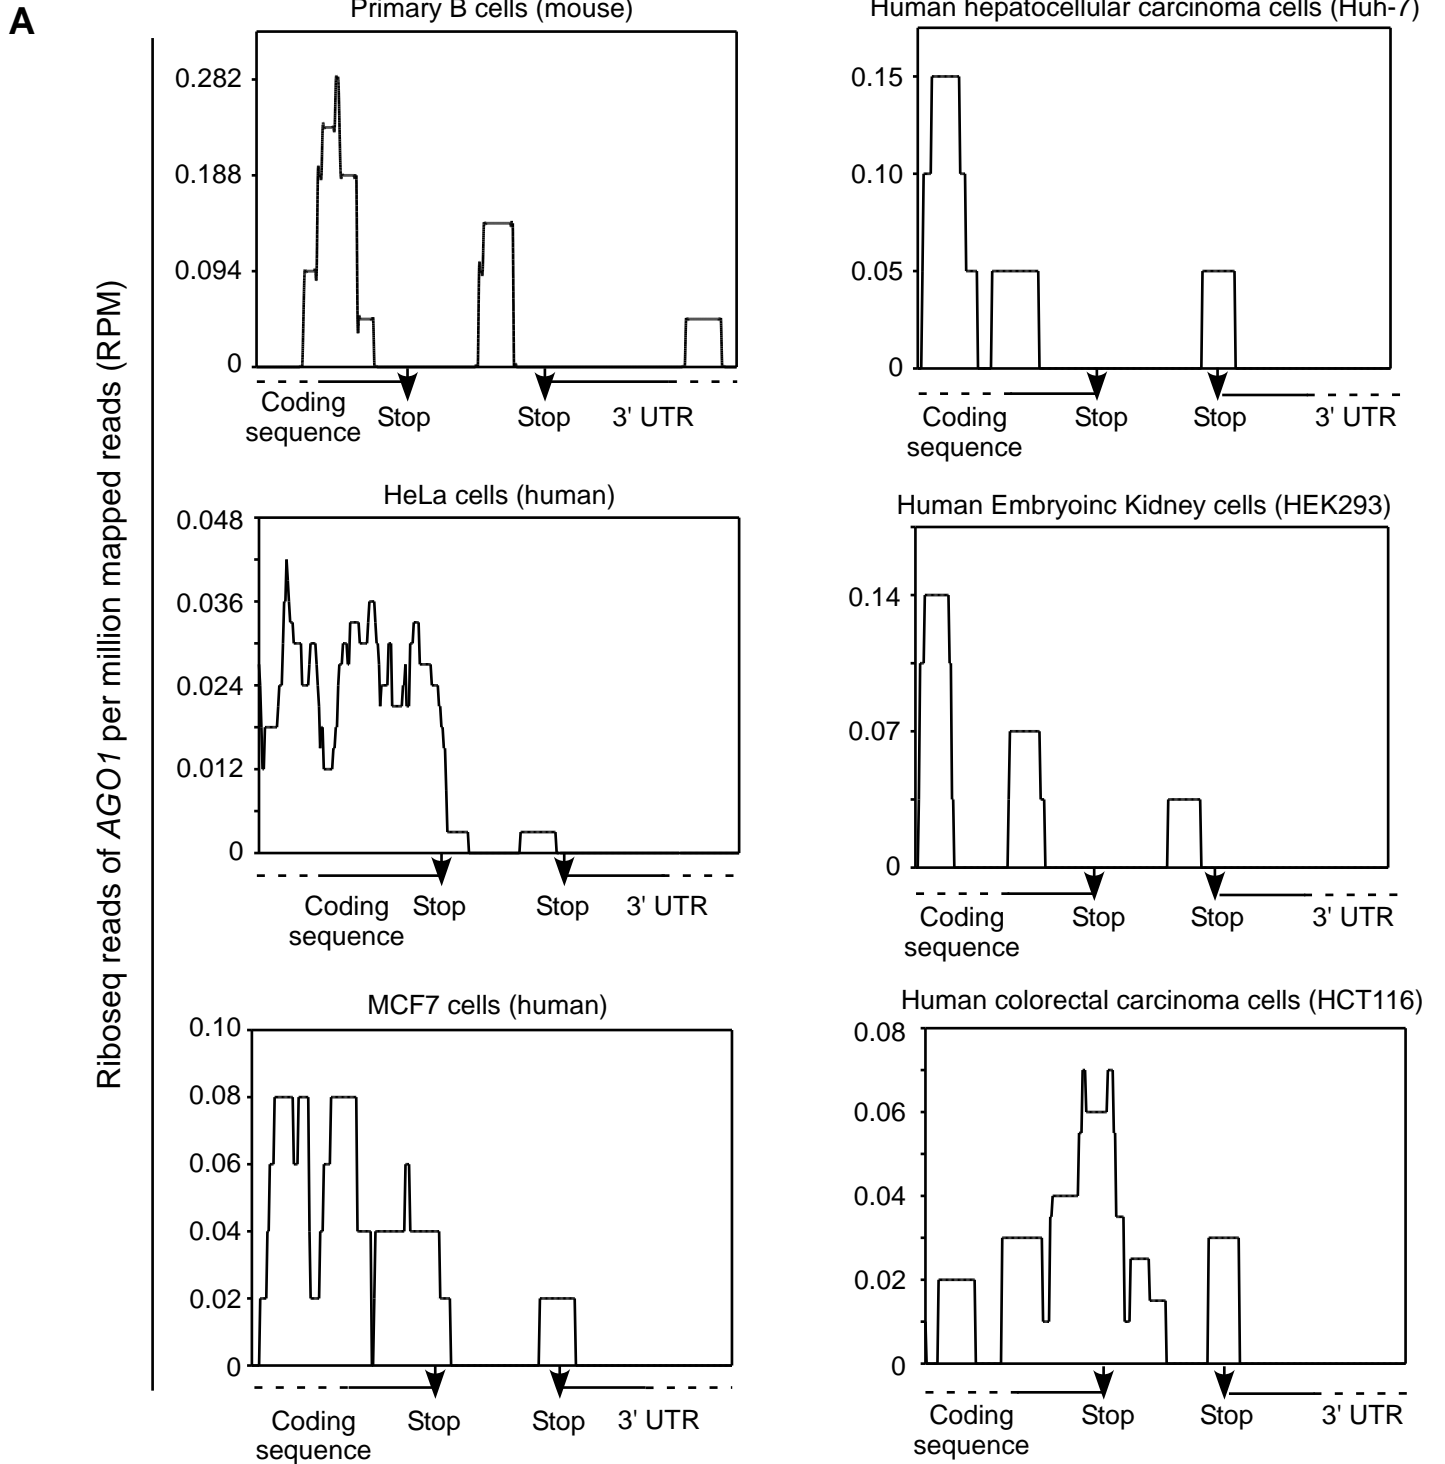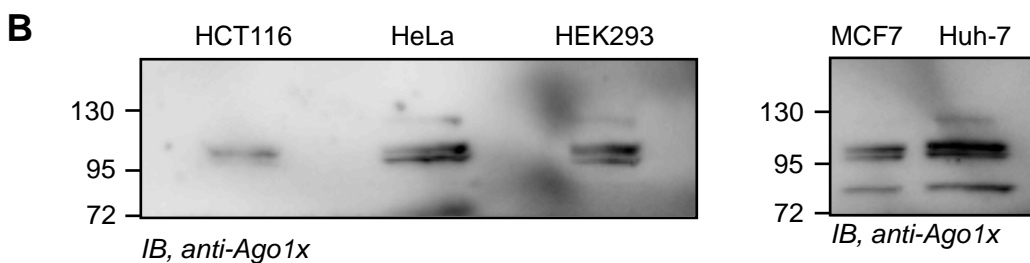

# Appendix Figure S2

**A**

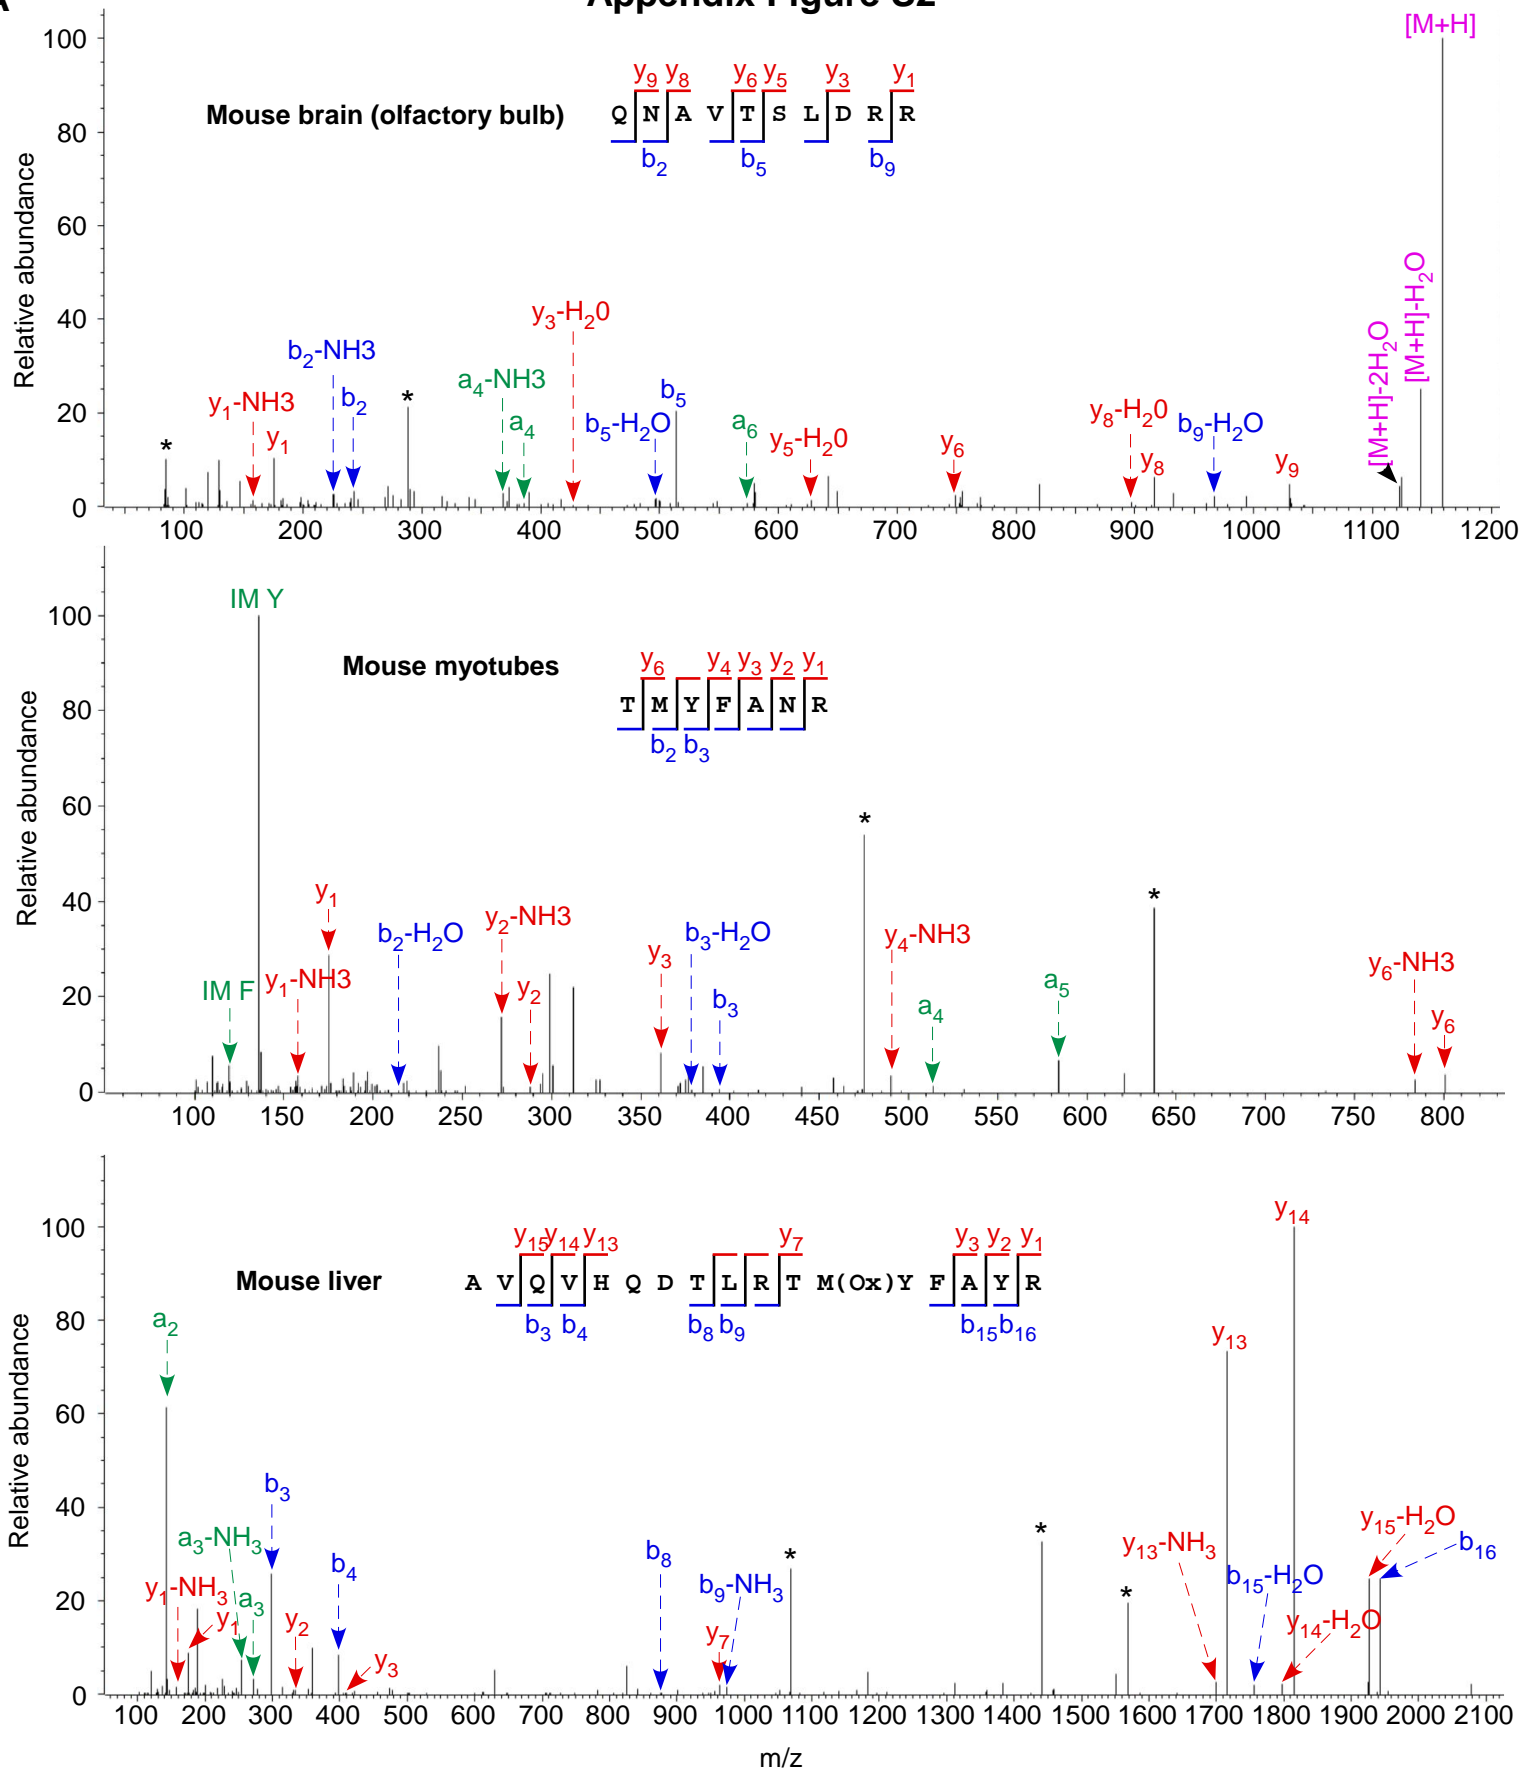

**B**

.....ALAKAVQHQD**L**RTMYFA\***RQ**NAV**TSLDRR**KLSPWELYHPNPEEARQREVGSEGV\*

Liver
Brain

Myotubes

# Appendix Figure S3

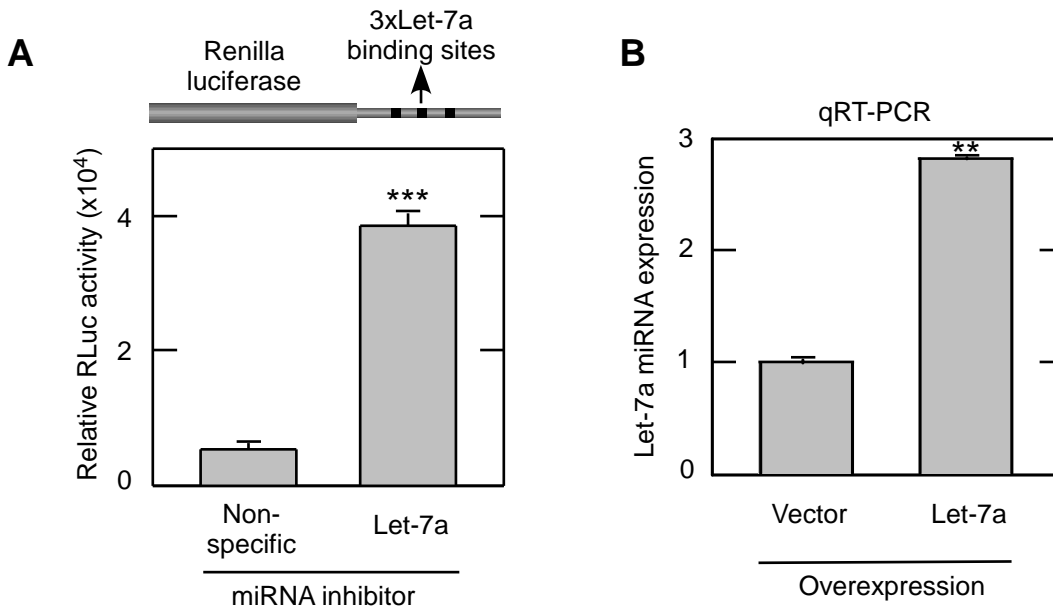

## Appendix Figure S4

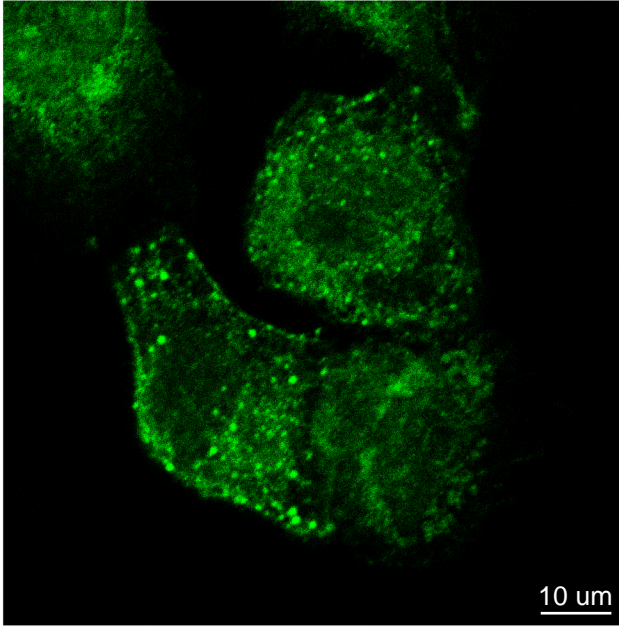

*IF, anti-Ago1x*

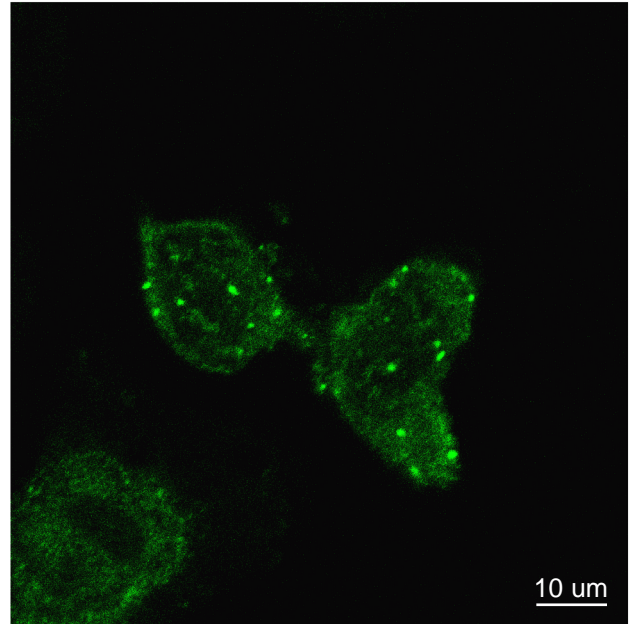

*IF, anti-Ago1*

Appendix Figure S5

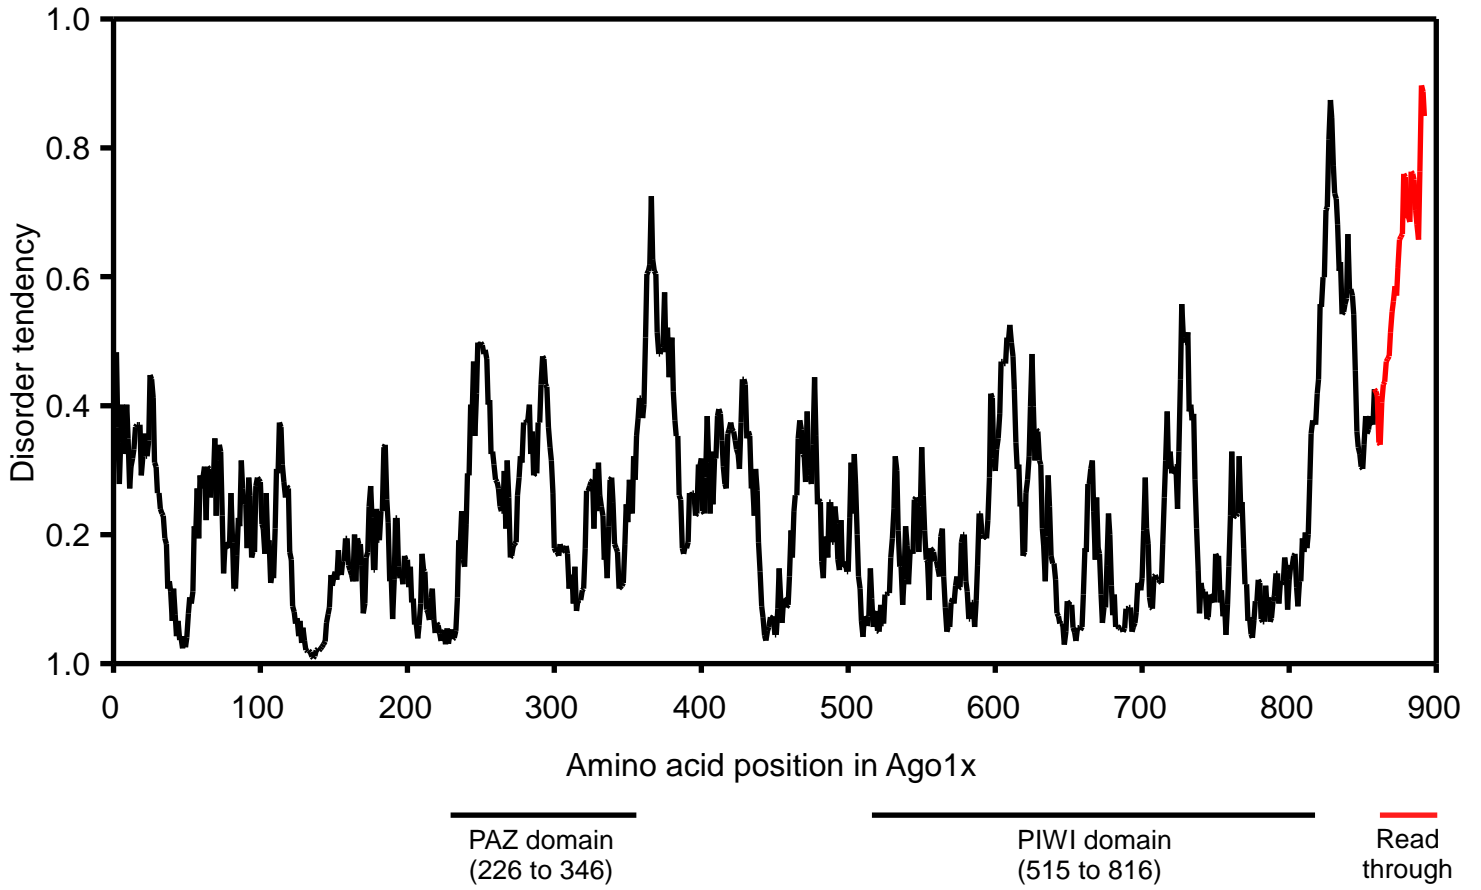

## Legends to Appendix Supplementary Figures

**Appendix Figure S1.** (A) Presence of ribosome footprints in the Inter stop codon region of *AGO1* transcript in mouse primary B cells (NCBI Accession no. SRR1605309), Huh-7 cells (NCBI Accession no. SRR2052945), HeLa cells (NCBI Accession no. SRR5013257), HEK293 cells (NCBI Accession no. SRR2096965), MCF7 cells (NCBI Accession no. SRR5345623) and HCT116 cells (NCBI Accession no. SRR4293695). Ribosome profiling data was taken from NCBI's sequence read archive (SRA) and ribosome footprints on *AGO1* transcript were analyzed as described in Methods section. Arrows indicate the position of canonical stop codon and the downstream in-frame stop codon. (B) Expression of Ago1x in multiple cell lines.

**Appendix Figure S2.** (A) MS/MS spectra of Ago1x-specific peptides found in mouse brain (olfactory bulb), liver and myotubes. The spectra contain several contaminant ions (\*) probably because of low abundance. (B) The position of these peptides in the C-terminus of Ago1x is shown. \*, position of two stop codons.

**Appendix Figure S3.** (A) Validation of Let-7a miRNA inhibitor. RLuc with 3x Let-7a miRNA binding sites in its 3'UTR was expressed in HeLa cells treated with Let-7a miRNA inhibitor or control inhibitor. RLuc activity along with the activity of co-transfected FLuc was measured after 48 h. \*\*\*,  $P < 0.0001$  (Student's t test). (B) Demonstration of overexpression of Let-7a miRNA in HeLa cells stably expressing Pri-Let-7a. Quantitative real time PCR was done using Let-7a-specific Taqman probe. \*\*,  $P = 0.0015$  (Student's t test with Welch's correction).

**Appendix Figure S4.** Confocal immunofluorescence images of HeLa cells showing punctate distribution of Ago1 and Ago1x.

**Appendix Figure S5.** Estimation of disorder tendency at every amino acid position in Ago1x. The analysis was done using IUPred web server.



**Appendix Table S1. List of miRNAs interacting with both Ago1 and Ago1x**

|    | miRDeep2 ID  | miRBase ID      | Mean RPM in Ago1 IP samples (N=2) | Mean RPM in Ago1x IP samples (N=2) |
|----|--------------|-----------------|-----------------------------------|------------------------------------|
| 1  | chr10_515951 | NA              | 12926.475                         | 6673.24                            |
| 2  | chr10_515952 | NA              | 8157.835                          | 3825.53                            |
| 3  | chr10_520588 | NA              | 458.505                           | 251.835                            |
| 4  | chr10_521097 | NA              | 631.31                            | 308.105                            |
| 5  | chr10_533286 | hsa-miR-146b-5p | 122.12                            | 222.33                             |
| 6  | chr10_537166 | NA              | 384.525                           | 222.33                             |
| 7  | chr10_547194 | NA              | 210.435                           | 500.92                             |
| 8  | chr10_550195 | NA              | 1803.06                           | 752.755                            |
| 9  | chr10_553552 | hsa-miR-107     | 309.265                           | 637.47                             |
| 10 | chr10_555599 | NA              | 1406.75                           | 1502.76                            |
| 11 | chr10_560303 | NA              | 125.95                            | 388.385                            |
| 12 | chr10_561004 | NA              | 190.985                           | 530.425                            |
| 13 | chr1_100648  | NA              | 1027.615                          | 1001.84                            |
| 14 | chr1_1068    | NA              | 705.295                           | 559.94                             |
| 15 | chr1_10724   | hsa-miR-30e-5p  | 663.83                            | 723.25                             |
| 16 | chr1_1291    | NA              | 1757.755                          | 4045.11                            |
| 17 | chr11_562701 | NA              | 1239.33                           | 835.785                            |
| 18 | chr11_562755 | NA              | 2243.385                          | 2456.575                           |
| 19 | chr11_562912 | NA              | 336.39                            | 334.865                            |
| 20 | chr11_563574 | NA              | 311.82                            | 640.22                             |
| 21 | chr11_567981 | NA              | 649.485                           | 139.3                              |
| 22 | chr11_570824 | NA              | 471.565                           | 308.105                            |
| 23 | chr11_577072 | NA              | 87.04                             | 278.595                            |
| 24 | chr11_577740 | NA              | 6773.45                           | 5443.58                            |
| 25 | chr11_580089 | NA              | 406.535                           | 334.865                            |
| 26 | chr1_15855   | NA              | 954.91                            | 2818.195                           |
| 27 | chr11_585557 | NA              | 1641.76                           | 2785.945                           |
| 28 | chr11_587294 | NA              | 7175.14                           | 4296.945                           |
| 29 | chr11_593469 | NA              | 1045.79                           | 1398.47                            |
| 30 | chr11_606128 | NA              | 6778.565                          | 5582.875                           |
| 31 | chr11_610495 | NA              | 3442.26                           | 3908.56                            |
| 32 | chr11_610655 | hsa-miR-125b-5p | 141.57                            | 278.595                            |
| 33 | chr11_610667 | hsa-let-7a-5p   | 627.48                            | 699.23                             |
| 34 | chr11_610685 | hsa-miR-100-5p  | 2285.125                          | 1146.635                           |
| 35 | chr11_611704 | NA              | 3565.925                          | 4723.08                            |
| 36 | chr1_18163   | NA              | 296.2                             | 693.735                            |
| 37 | chr1_22683   | NA              | 584.46                            | 785.01                             |

|    |              |                 |          |          |
|----|--------------|-----------------|----------|----------|
| 38 | chr12_621477 | NA              | 16721.01 | 23312.79 |
| 39 | chr12_625662 | hsa-miR-196a-5p | 507.915  | 583.95   |
| 40 | chr12_625839 | hsa-miR-148b-3p | 1919.05  | 1256.42  |
| 41 | chr12_627852 | hsa-let-7i-5p   | 18726.83 | 24982.22 |
| 42 | chr12_634411 | NA              | 209.16   | 305.355  |
| 43 | chr12_634492 | NA              | 1526.31  | 1896.64  |
| 44 | chr12_638876 | NA              | 574.225  | 752.755  |
| 45 | chr12_644268 | NA              | 367.625  | 278.595  |
| 46 | chr12_648707 | NA              | 211.715  | 308.105  |
| 47 | chr12_652098 | NA              | 897.555  | 589.445  |
| 48 | chr12_653472 | NA              | 6833.37  | 4270.185 |
| 49 | chr12_653813 | hsa-miR-26a-5p  | 5714.6   | 6635.49  |
| 50 | chr12_659503 | NA              | 419.595  | 251.835  |
| 51 | chr12_660371 | NA              | 352.01   | 500.92   |
| 52 | chr12_660934 | NA              | 622.085  | 613.455  |
| 53 | chr12_665621 | NA              | 105.22   | 471.415  |
| 54 | chr12_665637 | NA              | 248.07   | 195.565  |
| 55 | chr12_666349 | NA              | 229.89   | 139.3    |
| 56 | chr12_666626 | NA              | 740.365  | 814.52   |
| 57 | chr1_32007   | hsa-miR-92b-3p  | 674.33   | 918.81   |
| 58 | chr1_32671   | NA              | 175.365  | 361.62   |
| 59 | chr1_32709   | NA              | 658.44   | 278.595  |
| 60 | chr13_667956 | NA              | 742.925  | 616.205  |
| 61 | chr13_672506 | NA              | 794.895  | 975.08   |
| 62 | chr13_674508 | hsa-miR-17-5p   | 1098.035 | 557.19   |
| 63 | chr13_674514 | hsa-miR-20a-5p  | 973.36   | 723.25   |
| 64 | chr13_674517 | hsa-miR-92a-3p  | 2224.2   | 2936.23  |
| 65 | chr13_681308 | NA              | 1767.715 | 2097.7   |
| 66 | chr13_683411 | NA              | 1631.53  | 1283.18  |
| 67 | chr13_687732 | NA              | 519.7    | 669.725  |
| 68 | chr14_689848 | NA              | 205.32   | 471.415  |
| 69 | chr14_695564 | NA              | 350.73   | 696.485  |
| 70 | chr14_696052 | NA              | 337.665  | 640.22   |
| 71 | chr14_696883 | NA              | 53.245   | 139.3    |
| 72 | chr14_696884 | NA              | 53.245   | 139.3    |
| 73 | chr14_700198 | NA              | 5796.795 | 6262.88  |
| 74 | chr14_703755 | NA              | 267.525  | 195.565  |
| 75 | chr14_704155 | NA              | 205.32   | 471.415  |
| 76 | chr14_710542 | NA              | 348.17   | 139.3    |
| 77 | chr14_710656 | NA              | 193.54   | 672.475  |
| 78 | chr14_715404 | NA              | 420.875  | 388.385  |

|     |              |                 |          |          |
|-----|--------------|-----------------|----------|----------|
| 79  | chr14_716600 | NA              | 1168.915 | 1446.49  |
| 80  | chr14_716649 | NA              | 1319.98  | 2611.645 |
| 81  | chr1_4901    | NA              | 7037.135 | 5695.415 |
| 82  | chr1_4902    | NA              | 6876.115 | 5556.115 |
| 83  | chr1_49605   | NA              | 5992.54  | 2245.235 |
| 84  | chr1_51950   | NA              | 212.995  | 833.035  |
| 85  | chr1_54130   | NA              | 329.995  | 139.3    |
| 86  | chr1_54547   | NA              | 229.89   | 417.89   |
| 87  | chr1_5456    | NA              | 1951.02  | 3075.525 |
| 88  | chr1_557     | NA              | 137.73   | 334.865  |
| 89  | chr15_727648 | NA              | 211.715  | 222.33   |
| 90  | chr15_728069 | NA              | 141.57   | 222.33   |
| 91  | chr15_728070 | NA              | 159.745  | 278.595  |
| 92  | chr15_728403 | NA              | 3051.34  | 3308.135 |
| 93  | chr15_728404 | NA              | 3122.77  | 3308.135 |
| 94  | chr15_730308 | hsa-miR-7-5p    | 8055.99  | 5341.32  |
| 95  | chr15_734615 | NA              | 5153.43  | 4693.575 |
| 96  | chr15_734847 | NA              | 2131.775 | 2643.9   |
| 97  | chr15_737274 | NA              | 771.605  | 471.415  |
| 98  | chr15_743512 | NA              | 922.4    | 752.755  |
| 99  | chr15_744400 | NA              | 279.305  | 278.595  |
| 100 | chr15_746053 | NA              | 8311.545 | 5076.46  |
| 101 | chr1_59006   | NA              | 1028.625 | 251.835  |
| 102 | chr1_61018   | NA              | 6789.065 | 5526.61  |
| 103 | chr1_63044   | NA              | 441.61   | 586.695  |
| 104 | chr1_65493   | NA              | 106.5    | 251.835  |
| 105 | chr1_67213   | NA              | 368.905  | 251.835  |
| 106 | chr16_751892 | NA              | 87.04    | 417.89   |
| 107 | chr16_754052 | NA              | 821.02   | 1229.665 |
| 108 | chr16_755309 | hsa-miR-193b-3p | 439.05   | 251.835  |
| 109 | chr16_755329 | hsa-miR-365b-3p | 103.94   | 222.33   |
| 110 | chr16_756237 | NA              | 8184.855 | 13415.77 |
| 111 | chr16_759433 | NA              | 5994.445 | 8004.45  |
| 112 | chr16_766319 | hsa-miR-140-3p  | 229.89   | 388.385  |
| 113 | chr16_769655 | NA              | 314.375  | 782.26   |
| 114 | chr16_772866 | NA              | 209.16   | 388.385  |
| 115 | chr16_774510 | NA              | 271.355  | 195.565  |
| 116 | chr16_774999 | NA              | 967.7    | 980.575  |
| 117 | chr16_775717 | NA              | 5474.935 | 8246.005 |
| 118 | chr16_775718 | NA              | 5511.285 | 8133.465 |
| 119 | chr16_776552 | NA              | 8184.855 | 13415.77 |

|     |              |                 |           |          |
|-----|--------------|-----------------|-----------|----------|
| 120 | chr16_776886 | NA              | 8184.855  | 13415.77 |
| 121 | chr16_777593 | NA              | 3065.135  | 4021.1   |
| 122 | chr16_778903 | NA              | 105.22    | 361.62   |
| 123 | chr16_781331 | NA              | 35.07     | 222.33   |
| 124 | chr16_782558 | NA              | 262.405   | 278.595  |
| 125 | chr16_789457 | NA              | 6643.66   | 4130.89  |
| 126 | chr16_789458 | NA              | 6624.21   | 4047.86  |
| 127 | chr16_790032 | NA              | 316.935   | 278.595  |
| 128 | chr1_69800   | hsa-miR-101-3p  | 883.49    | 476.91   |
| 129 | chr1_71005   | hsa-miR-186-5p  | 2341.205  | 1591.285 |
| 130 | chr1_71602   | NA              | 6917.58   | 5443.58  |
| 131 | chr1_73352   | NA              | 566.28    | 894.8    |
| 132 | chr1_75296   | NA              | 106.5     | 251.835  |
| 133 | chr1_76099   | NA              | 559.89    | 1108.88  |
| 134 | chr1_77720   | NA              | 2322.755  | 865.29   |
| 135 | chr17_793251 | NA              | 153.35    | 139.3    |
| 136 | chr17_793252 | NA              | 293.645   | 391.135  |
| 137 | chr17_793285 | NA              | 1314.59   | 924.305  |
| 138 | chr17_801209 | hsa-miR-423-3p  | 976.925   | 2236.995 |
| 139 | chr17_801574 | NA              | 190.985   | 892.055  |
| 140 | chr17_802143 | hsa-miR-365b-3p | 205.32    | 222.33   |
| 141 | chr17_802354 | NA              | 190.985   | 892.055  |
| 142 | chr17_808740 | NA              | 6773.45   | 5443.58  |
| 143 | chr17_808903 | NA              | 584.46    | 222.33   |
| 144 | chr17_810968 | hsa-miR-21-5p   | 30877.645 | 15816.08 |
| 145 | chr17_814203 | NA              | 474.12    | 474.16   |
| 146 | chr17_815626 | NA              | 4960.08   | 6273.87  |
| 147 | chr17_822778 | hsa-miR-324-3p  | 139.015   | 334.865  |
| 148 | chr17_827132 | NA              | 248.07    | 222.33   |
| 149 | chr17_828328 | NA              | 172.81    | 308.105  |
| 150 | chr17_830622 | NA              | 192.26    | 278.595  |
| 151 | chr17_830646 | NA              | 122.12    | 251.835  |
| 152 | chr17_830670 | NA              | 1912.385  | 1567.27  |
| 153 | chr17_832661 | NA              | 7276.25   | 4465.75  |
| 154 | chr17_833160 | NA              | 87.04     | 444.65   |
| 155 | chr17_834991 | hsa-miR-10a-5p  | 279.305   | 139.3    |
| 156 | chr17_835033 | hsa-miR-196a-5p | 457.225   | 583.95   |
| 157 | chr17_835105 | NA              | 12119.14  | 17919.27 |
| 158 | chr17_842466 | NA              | 336.39    | 530.425  |
| 159 | chr17_843305 | NA              | 4340.36   | 3158.555 |
| 160 | chr17_844209 | NA              | 676.885   | 1371.705 |

|     |              |                 |          |           |
|-----|--------------|-----------------|----------|-----------|
| 161 | chr1_8291    | NA              | 261.13   | 278.595   |
| 162 | chr1_8292    | NA              | 345.615  | 278.595   |
| 163 | chr1_84457   | NA              | 450.835  | 1146.635  |
| 164 | chr18_849269 | NA              | 140.295  | 222.33    |
| 165 | chr18_854970 | NA              | 8202.215 | 7833.605  |
| 166 | chr18_864531 | NA              | 539.155  | 696.485   |
| 167 | chr1_91983   | NA              | 298.76   | 308.105   |
| 168 | chr1_92569   | hsa-miR-181a-5p | 348.17   | 616.205   |
| 169 | chr1_92699   | NA              | 10901.66 | 14347.61  |
| 170 | chr1_93620   | NA              | 10466.96 | 20763.52  |
| 171 | chr1_95190   | hsa-miR-29b-3p  | 172.81   | 388.385   |
| 172 | chr19_864676 | NA              | 6987.725 | 5443.58   |
| 173 | chr19_866213 | NA              | 212.995  | 471.415   |
| 174 | chr19_867550 | hsa-miR-7-5p    | 8022.195 | 5341.32   |
| 175 | chr19_870255 | NA              | 346.89   | 474.16    |
| 176 | chr19_871200 | hsa-miR-181d-5p | 592.4    | 417.89    |
| 177 | chr19_871999 | NA              | 3903.05  | 9459.18   |
| 178 | chr19_879863 | NA              | 348.17   | 444.65    |
| 179 | chr19_880540 | hsa-miR-769-5p  | 1231.66  | 308.105   |
| 180 | chr19_882832 | hsa-miR-99b-5p  | 1005.6   | 1736.075  |
| 181 | chr19_882834 | hsa-let-7e-5p   | 70.145   | 583.95    |
| 182 | chr19_884542 | NA              | 1570.61  | 222.33    |
| 183 | chr19_885366 | NA              | 209.16   | 391.135   |
| 184 | chr19_893131 | hsa-miR-24-3p   | 1333.04  | 1028.6    |
| 185 | chr19_893132 | hsa-miR-24-3p   | 1333.04  | 1028.6    |
| 186 | chr19_893134 | hsa-miR-27a-3p  | 2120.54  | 2172.485  |
| 187 | chr19_893136 | hsa-miR-23a-3p  | 1127.72  | 1505.51   |
| 188 | chr19_894202 | NA              | 280.58   | 139.3     |
| 189 | chr19_896093 | NA              | 71.425   | 195.565   |
| 190 | chr19_899247 | NA              | 428.545  | 195.565   |
| 191 | chr19_900532 | NA              | 559.89   | 554.445   |
| 192 | chr19_902305 | NA              | 805.4    | 2555.38   |
| 193 | chr19_903014 | NA              | 747.035  | 1333.955  |
| 194 | chr1_99994   | NA              | 9751.275 | 12904.575 |
| 195 | chr20_903705 | NA              | 9119.605 | 2269.25   |
| 196 | chr20_904393 | NA              | 1552.16  | 1564.525  |
| 197 | chr20_904665 | hsa-miR-103a-3p | 1004.325 | 1221.42   |
| 198 | chr20_905315 | NA              | 623.365  | 533.175   |
| 199 | chr20_906955 | NA              | 6917.58  | 5443.58   |
| 200 | chr20_908602 | NA              | 2242.11  | 2116.215  |
| 201 | chr20_910048 | NA              | 24590.81 | 30934.345 |

|     |              |                |          |           |
|-----|--------------|----------------|----------|-----------|
| 202 | chr20_910354 | NA             | 106.5    | 476.91    |
| 203 | chr20_911998 | NA             | 437.77   | 305.355   |
| 204 | chr20_916773 | NA             | 2251.335 | 3150.31   |
| 205 | chr20_919086 | NA             | 1063.7   | 699.23    |
| 206 | chr20_922372 | NA             | 1143.34  | 2697.42   |
| 207 | chr20_925845 | NA             | 4207.74  | 4195.4    |
| 208 | chr2_104262  | NA             | 1143.34  | 1976.925  |
| 209 | chr2_112290  | NA             | 2291.52  | 1819.1    |
| 210 | chr2_115447  | NA             | 348.17   | 195.565   |
| 211 | chr2_116746  | NA             | 6551.505 | 4406.735  |
| 212 | chr2_118220  | NA             | 2845.75  | 2011.925  |
| 213 | chr2_118617  | NA             | 1192.205 | 921.56    |
| 214 | chr2_123783  | NA             | 1786.43  | 3458.415  |
| 215 | chr2_124989  | hsa-miR-128-3p | 120.835  | 139.3     |
| 216 | chr2_127594  | NA             | 1433.88  | 1259.17   |
| 217 | chr2_128179  | NA             | 2842.73  | 2628.125  |
| 218 | chr2_129488  | hsa-miR-7704   | 423.43   | 557.19    |
| 219 | chr2_135714  | NA             | 35.07    | 278.595   |
| 220 | chr2_144039  | NA             | 1335.6   | 1390.225  |
| 221 | chr2_148478  | NA             | 3564.645 | 2818.195  |
| 222 | chr2_149753  | NA             | 123.395  | 305.355   |
| 223 | chr2_156104  | NA             | 192.26   | 251.835   |
| 224 | chr2_157775  | NA             | 3904.875 | 2676.155  |
| 225 | chr2_160605  | NA             | 886.045  | 977.83    |
| 226 | chr2_170075  | NA             | 1494.8   | 809.025   |
| 227 | chr2_170532  | NA             | 682.005  | 1861.635  |
| 228 | chr21_929294 | hsa-miR-99a-5p | 2616.675 | 1985.16   |
| 229 | chr21_929296 | hsa-let-7c-5p  | 684.56   | 696.485   |
| 230 | chr21_930333 | NA             | 2300.2   | 2759.185  |
| 231 | chr21_932092 | NA             | 720.915  | 586.695   |
| 232 | chr21_934676 | NA             | 2368.06  | 2601.37   |
| 233 | chr21_934983 | NA             | 2009.385 | 2121.71   |
| 234 | chr21_935968 | NA             | 387.08   | 139.3     |
| 235 | chr21_936000 | NA             | 3440.985 | 3544.19   |
| 236 | chr21_939166 | NA             | 2183.745 | 3916.8    |
| 237 | chr22_942024 | NA             | 205.32   | 471.415   |
| 238 | chr22_943965 | NA             | 7464.87  | 12377.605 |
| 239 | chr22_948026 | NA             | 5830.51  | 2676.155  |
| 240 | chr22_950730 | NA             | 675.61   | 251.835   |
| 241 | chr22_951595 | NA             | 479.24   | 278.595   |
| 242 | chr22_951716 | hsa-let-7a-5p  | 627.48   | 699.23    |

|     |                |                 |          |           |
|-----|----------------|-----------------|----------|-----------|
| 243 | chr22_951933   | NA              | 187.145  | 500.92    |
| 244 | chr22_952191   | NA              | 4028.815 | 4969.42   |
| 245 | chr22_955865   | NA              | 923.68   | 1084.87   |
| 246 | chr22_956078   | NA              | 702.74   | 308.105   |
| 247 | chr22_956080   | NA              | 1279.25  | 755.5     |
| 248 | chr22_959748   | NA              | 1719.85  | 2006.43   |
| 249 | chr22_963646   | NA              | 453.39   | 779.515   |
| 250 | Chr22_963646.1 | NA              | 350.73   | 779.515   |
| 251 | chr3_177407    | NA              | 157.19   | 83.03     |
| 252 | chr3_178180    | NA              | 6643.66  | 4130.89   |
| 253 | chr3_180564    | hsa-miR-26a-5p  | 5623.72  | 6635.49   |
| 254 | chr3_185468    | NA              | 739.09   | 447.4     |
| 255 | chr3_197690    | NA              | 229.89   | 471.415   |
| 256 | chr3_203486    | NA              | 50313.72 | 52895.275 |
| 257 | chr3_209684    | NA              | 244.23   | 334.865   |
| 258 | chr3_212445    | hsa-miR-191-5p  | 674.33   | 833.035   |
| 259 | chr3_213633    | NA              | 215.555  | 391.135   |
| 260 | chr3_213832    | NA              | 7925.385 | 11567.165 |
| 261 | chr3_213840    | NA              | 7925.385 | 11567.165 |
| 262 | chr3_214157    | hsa-let-7g-5p   | 3328.36  | 3479.68   |
| 263 | chr3_233160    | NA              | 161.025  | 195.565   |
| 264 | chr4_234450    | NA              | 601.355  | 889.305   |
| 265 | chr4_235708    | NA              | 6689.51  | 8173.255  |
| 266 | chr4_235908    | NA              | 1339.435 | 444.65    |
| 267 | chr4_236851    | NA              | 3120.21  | 2673.41   |
| 268 | chr4_237130    | NA              | 1231.39  | 2228.755  |
| 269 | chr4_240973    | NA              | 609.3    | 305.355   |
| 270 | chr4_249460    | NA              | 910.615  | 476.91    |
| 271 | chr4_250922    | NA              | 305.15   | 195.565   |
| 272 | chr4_251730    | NA              | 910.615  | 1639.315  |
| 273 | chr4_254139    | NA              | 2298.185 | 2389.32   |
| 274 | chr4_255580    | hsa-miR-378d    | 176.645  | 139.3     |
| 275 | chr4_259375    | NA              | 335.11   | 364.37    |
| 276 | chr4_262115    | NA              | 196.095  | 361.62    |
| 277 | chr4_267902    | NA              | 284.42   | 417.89    |
| 278 | chr5_276250    | NA              | 1562.66  | 1066.355  |
| 279 | chr5_283090    | NA              | 477.96   | 388.385   |
| 280 | chr5_292783    | NA              | 757.265  | 613.455   |
| 281 | chr5_295371    | NA              | 261.13   | 278.595   |
| 282 | chr5_295894    | NA              | 159.745  | 251.835   |
| 283 | chr5_296799    | hsa-miR-378a-3p | 2203.2   | 2261.01   |

|     |             |                 |          |          |
|-----|-------------|-----------------|----------|----------|
| 284 | chr5_300725 | NA              | 466.18   | 251.835  |
| 285 | chr5_315244 | NA              | 791.06   | 833.035  |
| 286 | chr5_319207 | NA              | 177.92   | 251.835  |
| 287 | chr5_323590 | NA              | 387.08   | 420.64   |
| 288 | chr5_325879 | NA              | 397.58   | 557.19   |
| 289 | chr5_327216 | hsa-miR-103a-3p | 1004.325 | 1221.42  |
| 290 | chr5_329681 | hsa-miR-340-5p  | 231.175  | 278.595  |
| 291 | chr6_340304 | NA              | 266.245  | 334.865  |
| 292 | chr6_340851 | NA              | 337.665  | 361.62   |
| 293 | chr6_344036 | NA              | 811.795  | 1034.095 |
| 294 | chr6_345321 | NA              | 1484.845 | 918.81   |
| 295 | chr6_350173 | NA              | 6968.27  | 5443.58  |
| 296 | chr6_354527 | NA              | 261.13   | 361.62   |
| 297 | chr6_364859 | hsa-miR-30c-5p  | 640.535  | 1371.705 |
| 298 | chr6_364939 | hsa-miR-30a-5p  | 12494.44 | 11479.35 |
| 299 | chr6_369309 | NA              | 505.36   | 720.5    |
| 300 | chr6_369976 | NA              | 363.79   | 616.205  |
| 301 | chr6_375592 | NA              | 2299.195 | 3016.51  |
| 302 | chr6_376857 | NA              | 4709.725 | 5355.055 |
| 303 | chr7_386204 | NA              | 354.565  | 554.445  |
| 304 | chr7_393364 | NA              | 565      | 583.95   |
| 305 | chr7_393536 | NA              | 946.97   | 980.575  |
| 306 | chr7_394572 | NA              | 1031.18  | 500.92   |
| 307 | chr7_399287 | NA              | 338.945  | 139.3    |
| 308 | chr7_400245 | NA              | 105.22   | 444.65   |
| 309 | chr7_404189 | NA              | 226.055  | 251.835  |
| 310 | chr7_405477 | NA              | 2153.785 | 3581.23  |
| 311 | chr7_405642 | NA              | 997.66   | 1143.885 |
| 312 | chr7_409612 | NA              | 811.795  | 1004.59  |
| 313 | chr7_409849 | hsa-miR-148a-3p | 1409.585 | 1058.11  |
| 314 | chr7_409850 | hsa-miR-148a-3p | 1409.585 | 1058.11  |
| 315 | chr7_409950 | NA              | 107.775  | 139.3    |
| 316 | chr7_413092 | NA              | 1034.01  | 586.695  |
| 317 | chr7_418688 | NA              | 4248.935 | 3107.785 |
| 318 | chr7_421152 | hsa-miR-25-3p   | 1164.07  | 1585.79  |
| 319 | chr7_421823 | NA              | 6813.635 | 5582.875 |
| 320 | chr7_423642 | NA              | 2038.335 | 924.305  |
| 321 | chr7_423917 | NA              | 2284.31  | 2898.48  |
| 322 | chr7_425927 | hsa-miR-182-5p  | 766.49   | 1063.605 |
| 323 | chr7_426422 | hsa-miR-29a-3p  | 346.89   | 666.98   |
| 324 | chr7_426428 | hsa-miR-29b-3p  | 172.81   | 388.385  |



|     |             |                 |           |           |
|-----|-------------|-----------------|-----------|-----------|
| 325 | chr7_430719 | NA              | 8519.42   | 5381.815  |
| 326 | chr7_430867 | NA              | 6934.475  | 5443.58   |
| 327 | chr8_437436 | NA              | 280.58    | 334.865   |
| 328 | chr8_445431 | NA              | 1249.565  | 2673.41   |
| 329 | chr8_449083 | NA              | 1530.145  | 758.25    |
| 330 | chr8_450739 | NA              | 613.135   | 642.965   |
| 331 | chr8_452267 | NA              | 2056.24   | 2622.63   |
| 332 | chr8_453113 | NA              | 1572.89   | 1484.24   |
| 333 | chr8_453114 | NA              | 1609.245  | 1232.41   |
| 334 | chr8_454300 | NA              | 819.735   | 758.25    |
| 335 | chr8_454356 | NA              | 1344.55   | 1368.955  |
| 336 | chr8_454412 | NA              | 477.96    | 361.62    |
| 337 | chr8_454861 | NA              | 13797.445 | 10613.345 |
| 338 | chr8_456393 | NA              | 65668.74  | 41976.57  |
| 339 | chr8_459630 | NA              | 545.55    | 503.67    |
| 340 | chr8_467149 | hsa-miR-30d-5p  | 819.735   | 1146.635  |
| 341 | chr8_468218 | hsa-miR-151a-3p | 1601.575  | 1821.85   |
| 342 | chr9_471735 | hsa-miR-101-3p  | 883.49    | 476.91    |
| 343 | chr9_472515 | NA              | 2330.7    | 2619.885  |
| 344 | chr9_472827 | NA              | 226.055   | 251.835   |
| 345 | chr9_473001 | NA              | 1085.705  | 1671.565  |
| 346 | chr9_477638 | NA              | 301.315   | 447.4     |
| 347 | chr9_481032 | hsa-let-7f-5p   | 6787.515  | 6297.88   |
| 348 | chr9_481559 | hsa-miR-23b-3p  | 762.655   | 1055.365  |
| 349 | chr9_481561 | hsa-miR-27b-3p  | 2311.515  | 1256.42   |
| 350 | chr9_481565 | hsa-miR-24-3p   | 1333.04   | 1028.6    |
| 351 | chr9_486631 | NA              | 4098.685  | 2732.42   |
| 352 | chr9_486754 | hsa-miR-181a-5p | 348.17    | 616.205   |
| 353 | chr9_486756 | hsa-miR-181b-5p | 938.015   | 1419.735  |
| 354 | chr9_487076 | NA              | 22429.49  | 28115.435 |
| 355 | chr9_490593 | NA              | 1352.225  | 1642.06   |
| 356 | chr9_491059 | NA              | 6481.36   | 3935.325  |
| 357 | chr9_491885 | hsa-miR-126-3p  | 87.04     | 195.565   |
| 358 | chr9_495866 | NA              | 2012.215  | 1775.86   |
| 359 | chr9_499731 | NA              | 301.315   | 447.4     |
| 360 | chr9_499943 | NA              | 301.315   | 447.4     |
| 361 | chr9_500023 | NA              | 301.315   | 447.4     |
| 362 | chr9_501941 | hsa-miR-7-5p    | 8196.285  | 5397.585  |
| 363 | chr9_507681 | NA              | 6694.355  | 3908.56   |
| 364 | chr9_508187 | NA              | 904.22    | 835.785   |
| 365 | chr9_511459 | NA              | 122.12    | 195.565   |

|     |                    |                 |           |          |
|-----|--------------------|-----------------|-----------|----------|
| 366 | chrX_1000062       | hsa-miR-92a-3p  | 2224.2    | 2936.23  |
| 367 | chrX_1000064       | hsa-miR-19b-3p  | 68.865    | 139.3    |
| 368 | chrX_1001721       | hsa-miR-224-5p  | 1134.115  | 865.29   |
| 369 | chrX_1001729       | hsa-miR-452-5p  | 403.975   | 417.89   |
| 370 | chrX_1002674       | NA              | 159.745   | 305.355  |
| 371 | chrX_969888        | NA              | 176.645   | 139.3    |
| 372 | chrX_972388        | hsa-miR-532-5p  | 507.915   | 586.695  |
| 373 | chrX_974360        | NA              | 1066.525  | 2542.35  |
| 374 | chrX_979246        | NA              | 158.47    | 278.595  |
| 375 | chrX_982631        | NA              | 405.255   | 278.595  |
| 376 | chrX_982672        | NA              | 701.455   | 447.4    |
| 377 | chrX_987263        | NA              | 1062.69   | 530.425  |
| 378 | chrX_989305        | NA              | 12988.755 | 19116.68 |
| 379 | chrX_989740        | hsa-miR-221-3p  | 663.83    | 776.765  |
| 380 | chrX_989742        | hsa-miR-222-3p  | 346.89    | 364.37   |
| 381 | chrX_994139        | hsa-miR-374b-5p | 85.765    | 222.33   |
| 382 | chrX_994636        | NA              | 491.02    | 696.485  |
| 383 | chrX_997089        | NA              | 6510.96   | 6868.805 |
| 384 | chrX_999003        | NA              | 1782.325  | 417.89   |
| 385 | chrX_999004        | NA              | 1782.325  | 417.89   |
| 386 | GL383521.1_1029153 | NA              | 1335.6    | 1390.225 |
| 387 | KI270822.1_1037272 | NA              | 477.96    | 361.62   |
| 388 | KI270845.1_1015186 | NA              | 1168.915  | 1446.49  |
| 389 | KI270853.1_1018239 | NA              | 8184.855  | 13415.77 |
| 390 | KI270862.1_1021399 | NA              | 153.35    | 139.3    |
| 391 | KI270862.1_1021400 | NA              | 293.645   | 391.135  |
| 392 | KI270862.1_1021433 | NA              | 1314.59   | 924.305  |
| 393 | KI270910.1_1022355 | NA              | 153.35    | 139.3    |
| 394 | KI270910.1_1022389 | NA              | 1314.59   | 924.305  |
| 395 | KQ090013.1_1030120 | NA              | 1231.39   | 2228.755 |

**Appendix Table S2. List of miRNAs interacting with only Ago1x**

|   | miRDeep2 ID  | miRBase ID      | Mean RPM in Ago1 IP samples (N=2) | Mean RPM in Ago1x IP samples (N=2) |
|---|--------------|-----------------|-----------------------------------|------------------------------------|
| 1 | chr17_833827 | NA              | 0                                 | 195.565                            |
| 2 | chr19_871197 | hsa-miR-181c-5p | 0                                 | 139.3                              |

**Appendix Table S3. List of miRNAs interacting with only Ago1**

|    | miRDeep2 ID        | miRBase ID      | Mean RPM in Ago1 IP samples (N=2) | Mean RPM in Ago1x IP samples (N=2) |
|----|--------------------|-----------------|-----------------------------------|------------------------------------|
| 1  | chr10_528312       | NA              | 70.145                            | 0                                  |
| 2  | chr11_598270       | NA              | 35.07                             | 0                                  |
| 3  | chr12_613316       | NA              | 105.22                            | 0                                  |
| 4  | chr12_642295       | NA              | 107.775                           | 0                                  |
| 5  | chr15_734407       | NA              | 89.6                              | 0                                  |
| 6  | chr16_785688       | NA              | 71.425                            | 0                                  |
| 7  | chr17_814257       | NA              | 124.675                           | 0                                  |
| 8  | chr17_829532       | NA              | 53.245                            | 0                                  |
| 9  | chr17_834904       | hsa-miR-152-3p  | 51.97                             | 0                                  |
| 10 | chr17_835854       | NA              | 106.5                             | 0                                  |
| 11 | chr19_898325       | NA              | 53.245                            | 0                                  |
| 12 | chr20_905353       | NA              | 141.57                            | 0                                  |
| 13 | chr2_128048        | NA              | 51.97                             | 0                                  |
| 14 | chr2_155319        | NA              | 87.04                             | 0                                  |
| 15 | chr22_941895       | NA              | 158.47                            | 0                                  |
| 16 | chr3_184321        | NA              | 35.07                             | 0                                  |
| 17 | chr4_255334        | NA              | 89.6                              | 0                                  |
| 18 | chr5_273898        | NA              | 103.94                            | 0                                  |
| 19 | chr5_325091        | hsa-miR-584-5p  | 71.425                            | 0                                  |
| 20 | chr6_360902        | NA              | 35.07                             | 0                                  |
| 21 | chr7_397078        | NA              | 53.245                            | 0                                  |
| 22 | chr7_405634        | NA              | 176.645                           | 0                                  |
| 23 | chr7_413546        | NA              | 70.145                            | 0                                  |
| 24 | chrX_1000105       | hsa-miR-503-5p  | 87.04                             | 0                                  |
| 25 | chrX_1000106       | hsa-miR-503-5p  | 87.04                             | 0                                  |
| 26 | chrX_994318        | hsa-miR-374a-5p | 103.94                            | 0                                  |
| 27 | GL000225.1_1007780 | NA              | 158.47                            | 0                                  |
| 28 | KI270792.1_1031708 | NA              | 103.94                            | 0                                  |
| 29 | KI270857.1_1023826 | NA              | 53.245                            | 0                                  |

RPM, Reads per million mapped miRNA reads

IP, Immunoprecipitation
