# Supplementary material for: Let‐7a‐regulated translational readthrough of mammalian AGO1 generates a microRNA pathway inhibitor
Source: PubMed Central journal article supplement (PMC6694283; doi:10.15252/embj.2018100727), 2019-07-22
Supplement: EMBJ-38-e100727-s002.pdf [file EMBJ-38-e100727-s002.pdf]

## Expanded View Figures

### Figure EV1. Translational readthrough in *AGO1* (related to Fig 1).

- A Comparison of efficiency of translational readthrough of *AGO1* with that of *VEGFA*. The assay was done as described in Fig 1C.  $^{**}P = 0.0051$  (with Welch's correction);  $^{***}P = 0.002$ . Numbers indicate % of readthrough.
- B Significance of the identity of the canonical stop codon in *AGO1* translational readthrough. This *in vitro* assay was done as described in Fig 1E.  $^{***}P < 0.0001$ .
- C Demonstration of translational readthrough of *AGO1* using Myc-tag reporter assay. Plasmids containing in-frame *AGO1*-TGA (or CCA)-ISR-Myc/His were transfected in HEK293 cells. His-tagged proteins were enriched using the HisPur Ni-NTA resin, and the readthrough product was detected by Western blot.

Data information: Bar graphs (mean  $\pm$  SE) are representative of at least two independent experiments. Statistical significance was calculated using Student's *t*-test. ISR, inter-stop codon region;  $\Delta$ ISR, construct without ISR.

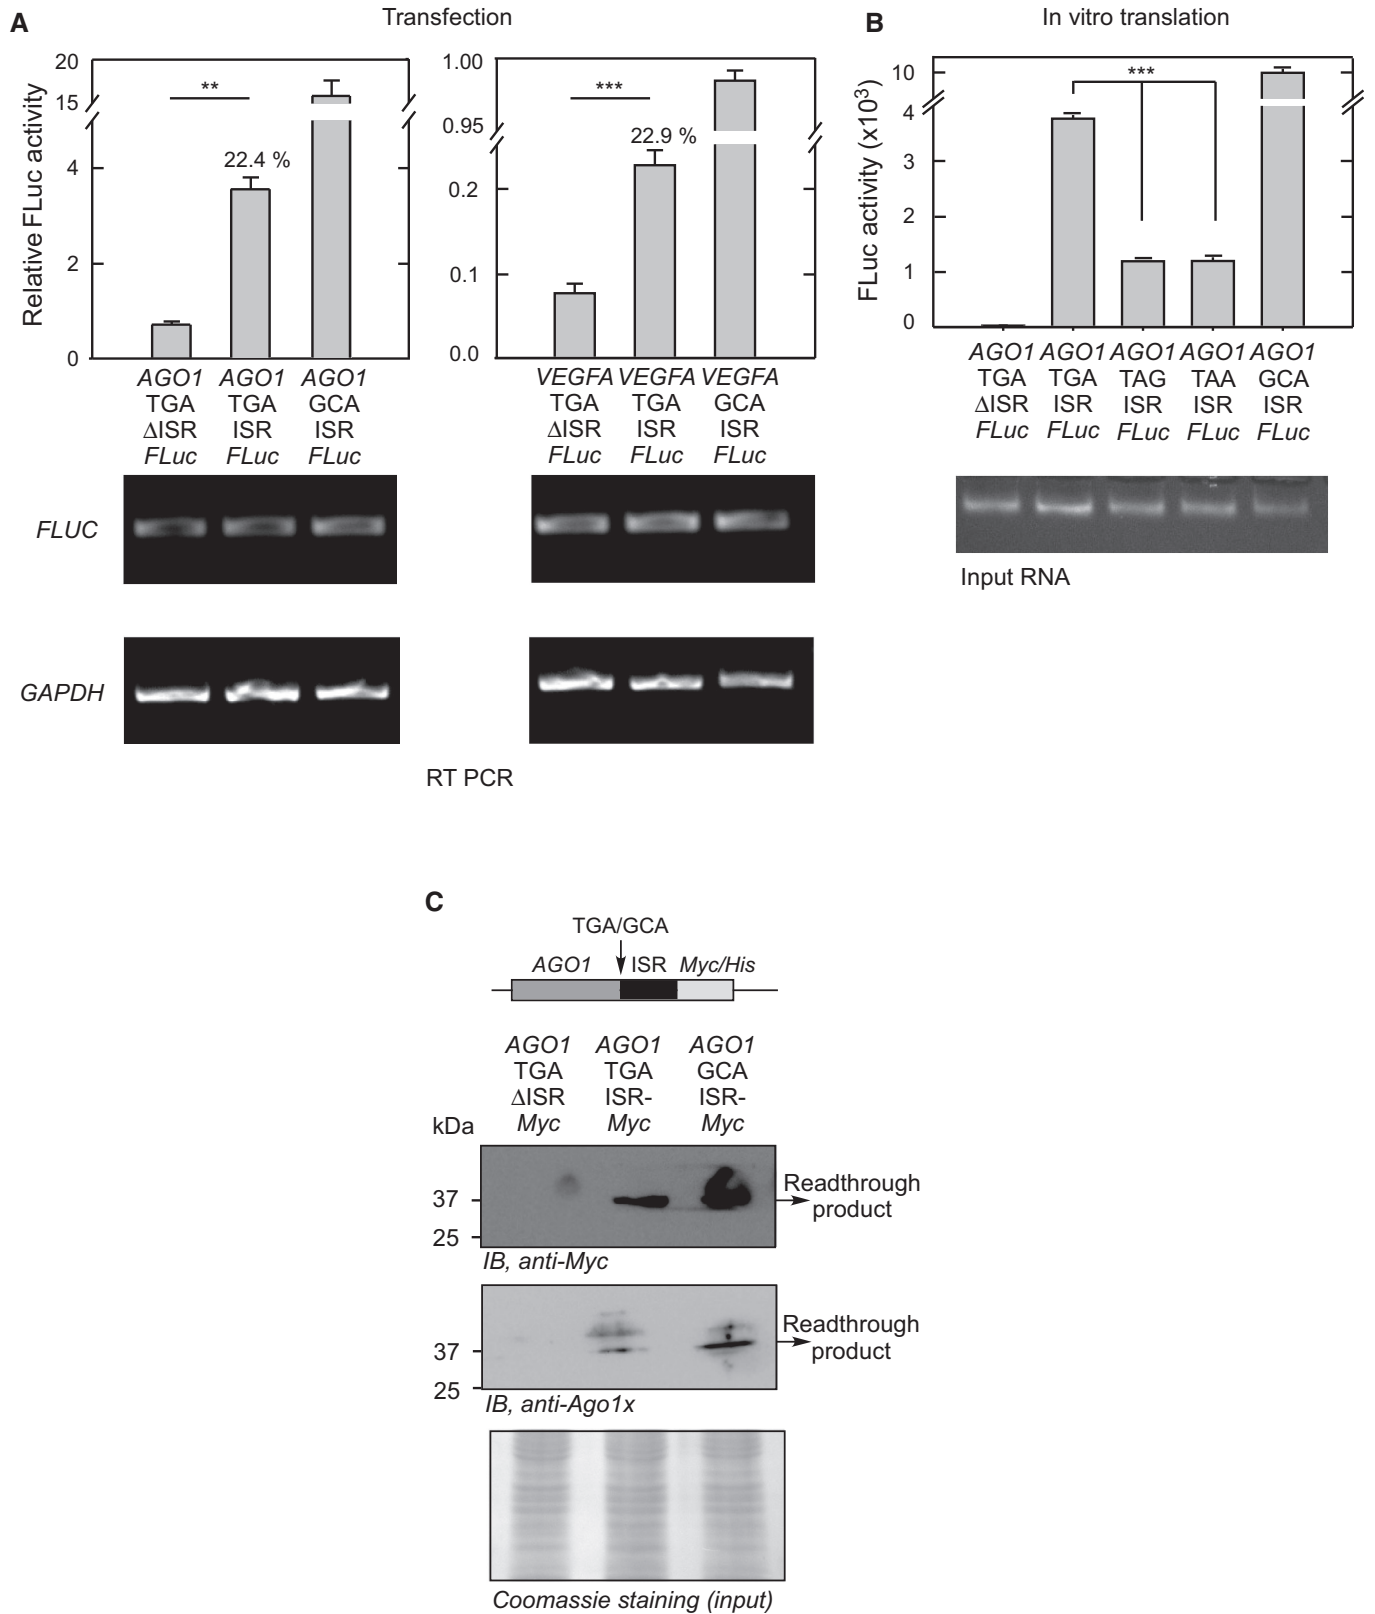

Figure EV1.

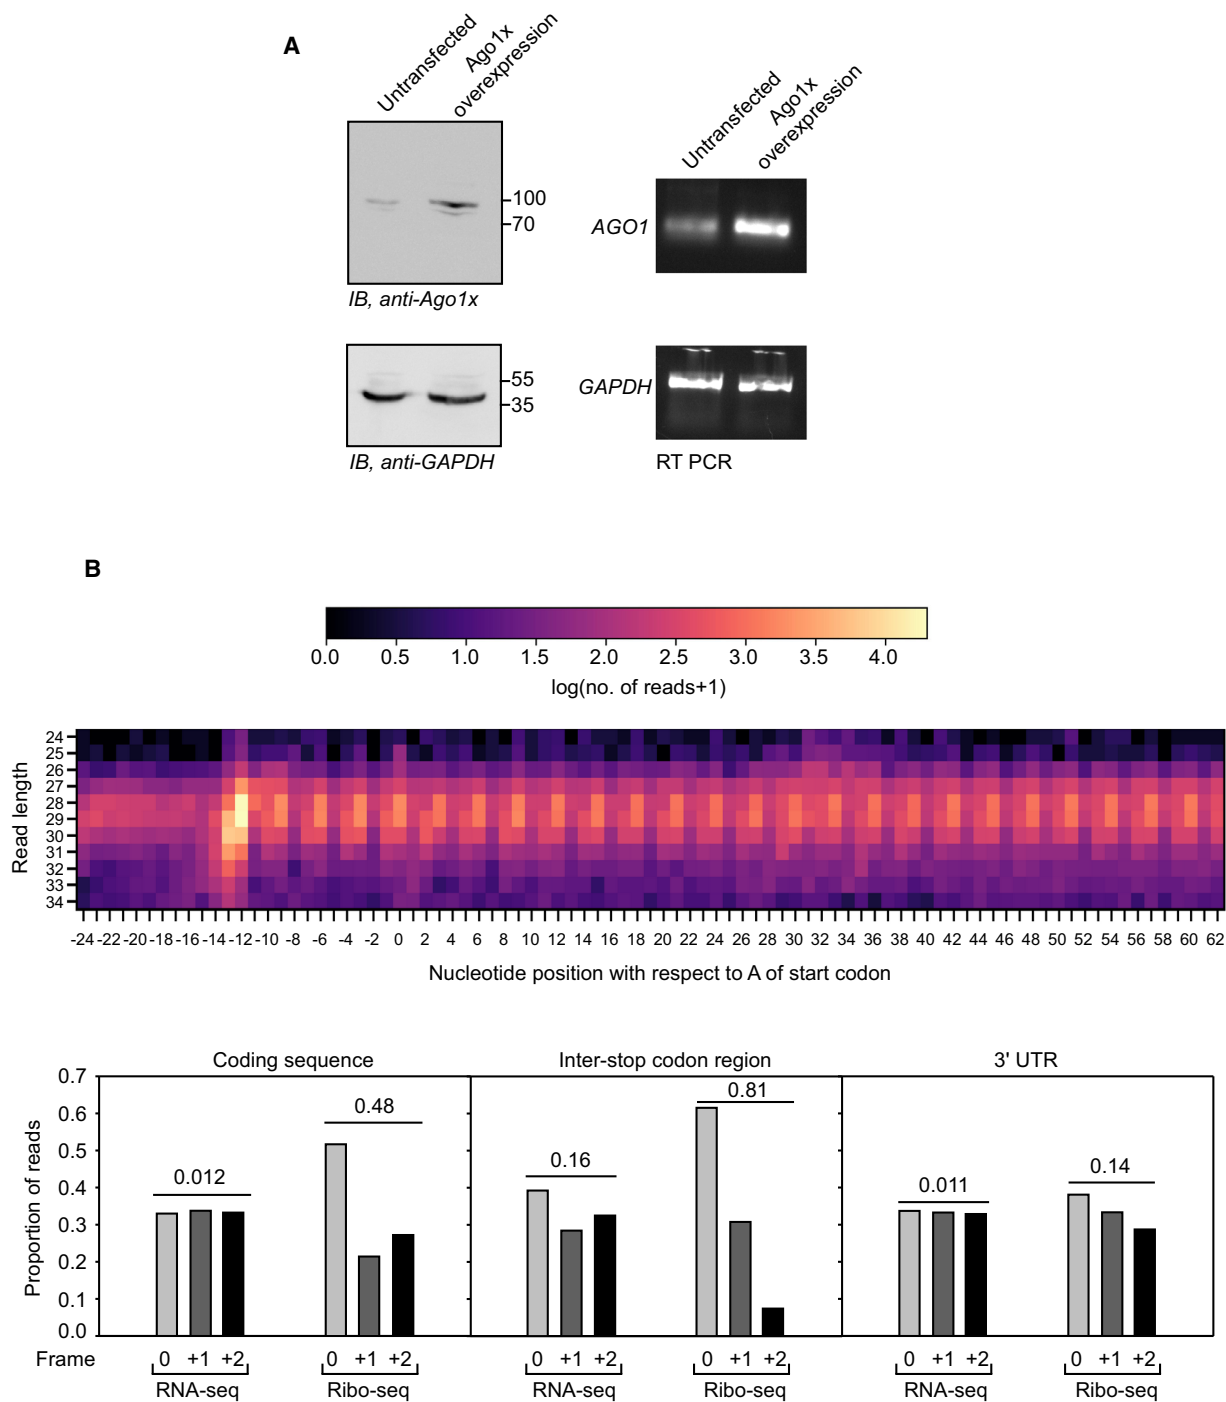

**Figure EV2. Validation of anti-Ago1x antibody and analysis of 3-nucleotide periodicity in ribosome profiling data (related to Fig 2).**

A Anti-Ago1x antibody can detect overexpressed Ago1x in HEK293 cells. RT-PCR results demonstrate the overexpression of *AGO1* transcript.

B Heat map showing the 3-nucleotide periodicity found in ribosome profiling data from U2-OS cells. 0 in x-axis represents A of the start codon. Graphs below show the proportion of RNA-seq and Ribo-seq (ribosome profiling) reads in three frames found in coding sequence, inter-stop codon region, and 3'UTR of *AGO1* transcript. Numbers on the bars indicate coefficient of variation (CV). Expectedly, RNA-seq reads showed a near-uniform distribution across the three frames ( $\approx 1/3$  in each frame) as indicated by very low CV, i.e., 0.012, 0.16, and 0.011. The distribution of Ribo-seq reads in coding sequence and inter-stop codon region was non-uniform with a majority of the reads in the 0<sup>th</sup> frame (CV: 0.48 and 0.81). However, Ribo-seq reads in 3'UTR showed a near-uniform distribution (CV: 0.14) as it is an untranslated region.

Source data are available online for this figure.

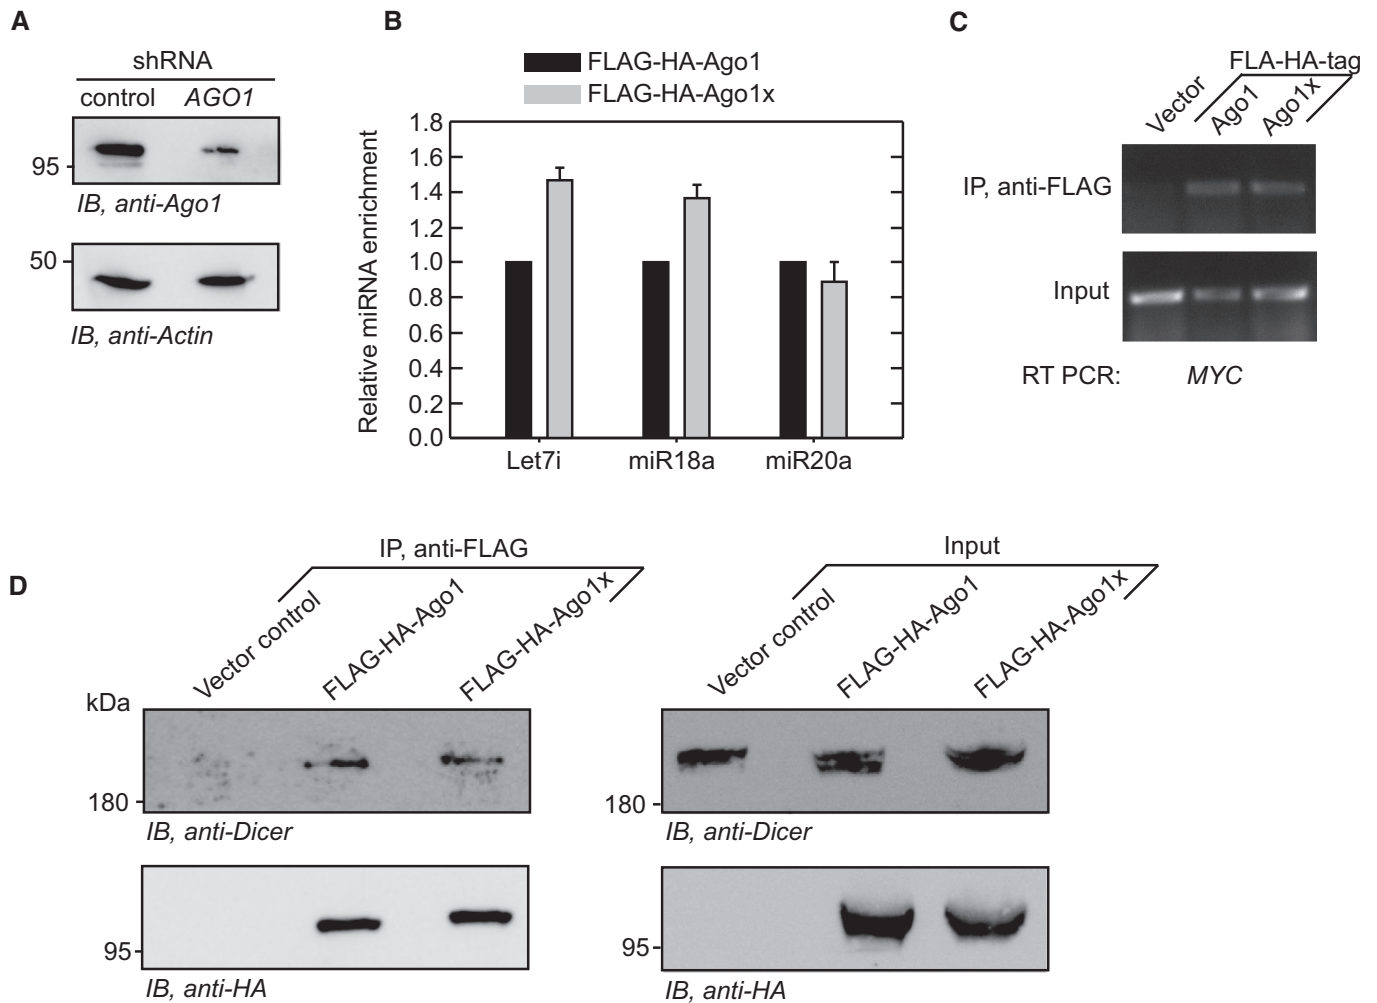

**Figure EV3. Exogenous Ago1x can load miRNAs onto target mRNA in AGO1 knockdown cells (related to Fig 5).**

- A Western blot showing the knockdown of AGO1 in HeLa cells. Cells were stably transfected with shRNA that targets the distal 3'UTR of AGO1.
- B qRT-PCR results showing the enrichment of three miRNAs in FLAG-HA-Ago1x immunoprecipitate relative to that in FLAG-HA-Ago1 immunoprecipitate in AGO1 knockdown HeLa cells. Bars: mean  $\pm$  SE ( $N = 3$ )
- C RT-PCR results showing MYC mRNA co-immunoprecipitated with FLAG-HA-Ago1 or FLAG-HA-Ago1x in AGO1 knockdown HeLa cells.
- D Result of co-immunoprecipitation experiments demonstrating the interaction of Dicer protein with FLAG-HA-Ago1 and FLAG-HA-Ago1x in AGO1 knockdown HeLa cells.

Source data are available online for this figure.

**Figure EV4. Additional evidences to show that Ago1x does not interact with GW182 (related to Figs 6 and 7).**

- A Result of co-immunoprecipitation experiment in AGO1 knockdown HeLa cells shows that GW182 is co-immunoprecipitated with FLAG-HA-Ago1, but not with FLAG-HA-Ago1x.
- B Result of co-immunoprecipitation experiment in HeLa cells shows that FLAG-HA-Ago1, but not FLAG-HA-Ago1x, is co-immunoprecipitated with endogenous GW182.
- C Confocal microscopy images of proximity ligation assay (PLA) in HeLa cells showing interaction of GW182 with Ago2, but not with Ago2ISR<sup>Ago1</sup>. Rabbit anti-GW182 and mouse anti-HA were used to achieve proximity ligation. Interaction is indicated by red dots that result from proximity ligation. Quantification of dots per cell is shown (\*\*\*)  $P = 0.0001$ , Mann-Whitney test). Each black circle represents a microscopic field. Means  $\pm$  SE are shown as horizontal lines ( $n = 7$  fields for vector control;  $n = 14$  fields for Ago2;  $n = 11$  fields for Ago2ISR<sup>Ago1</sup>). At least 80 cells were counted for dots in each category.

Source data are available online for this figure.

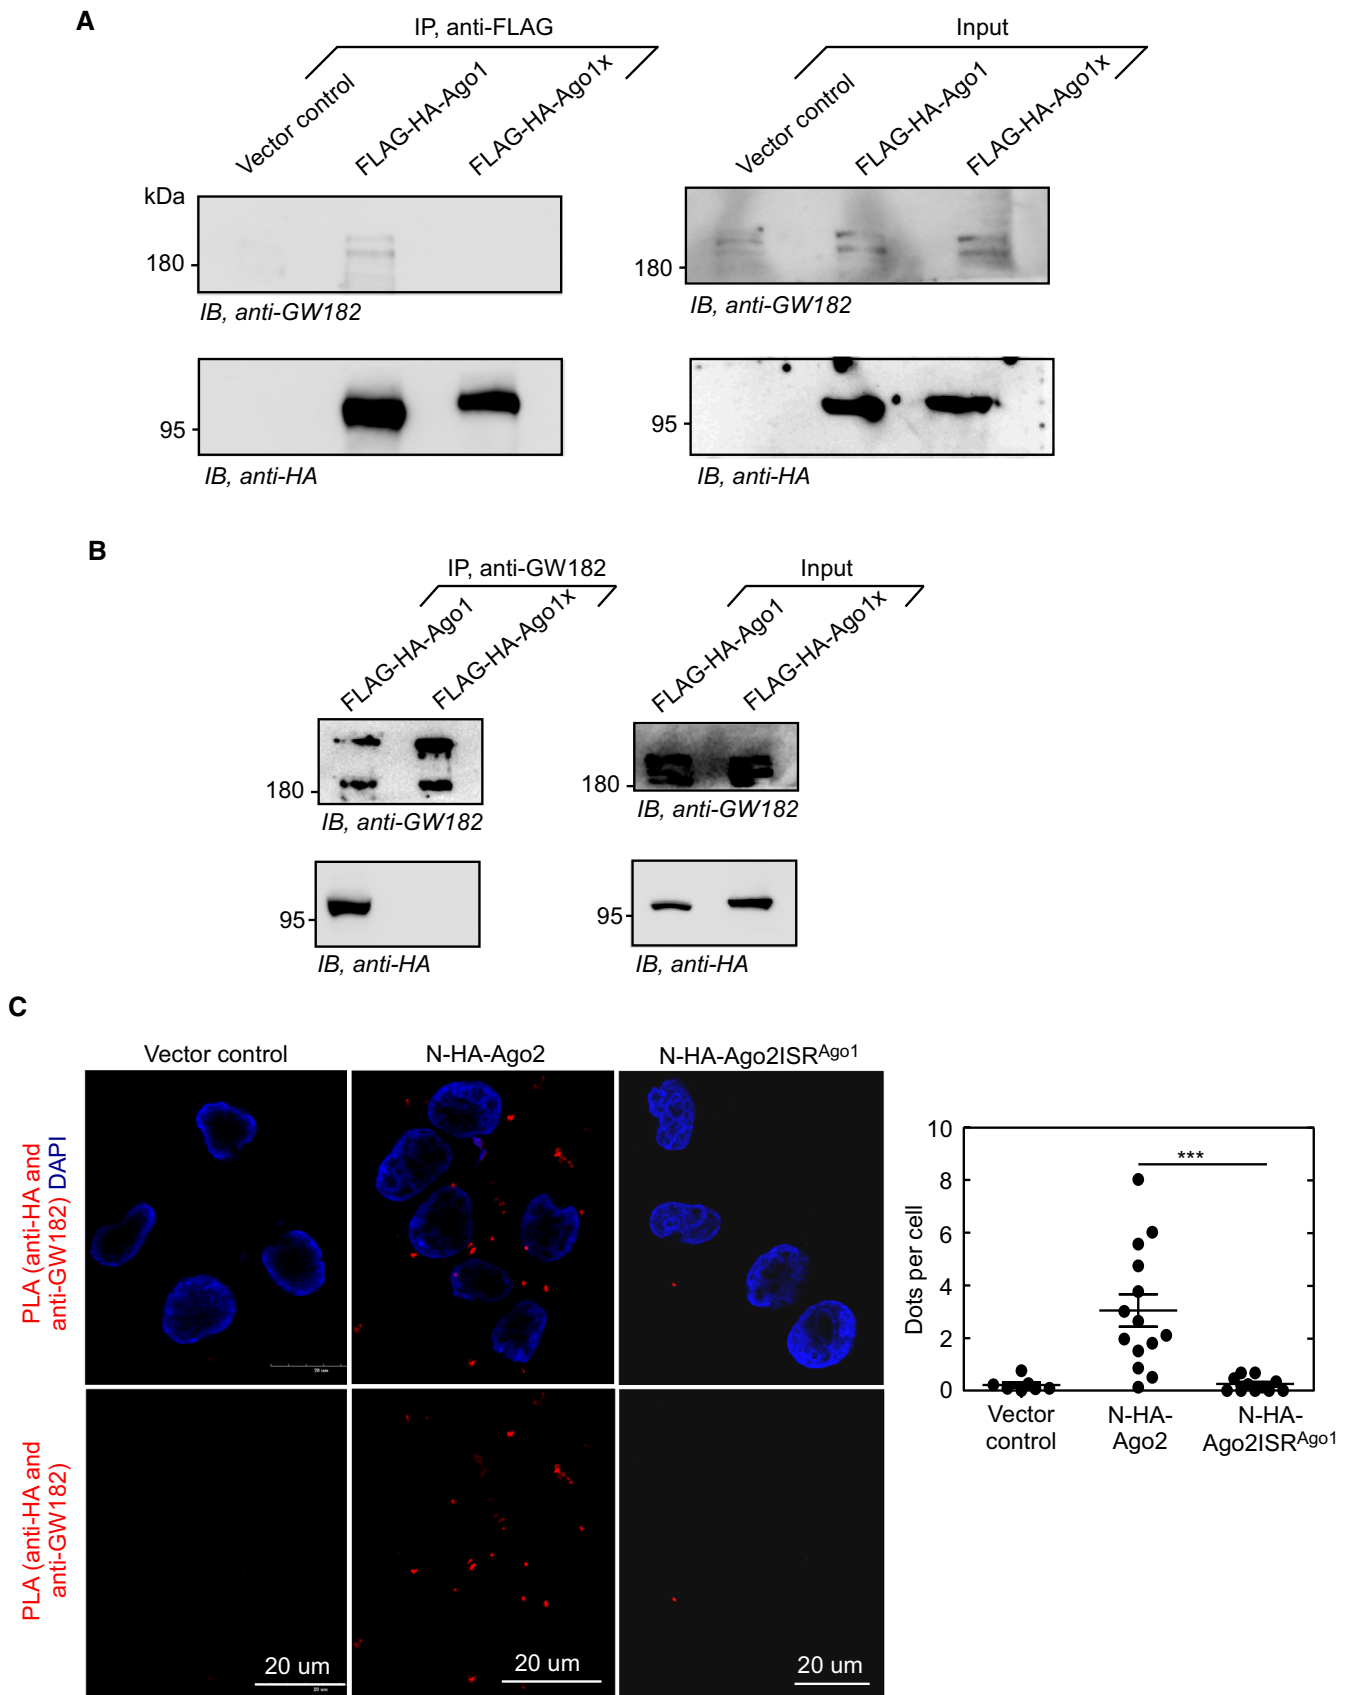

Figure EV4.

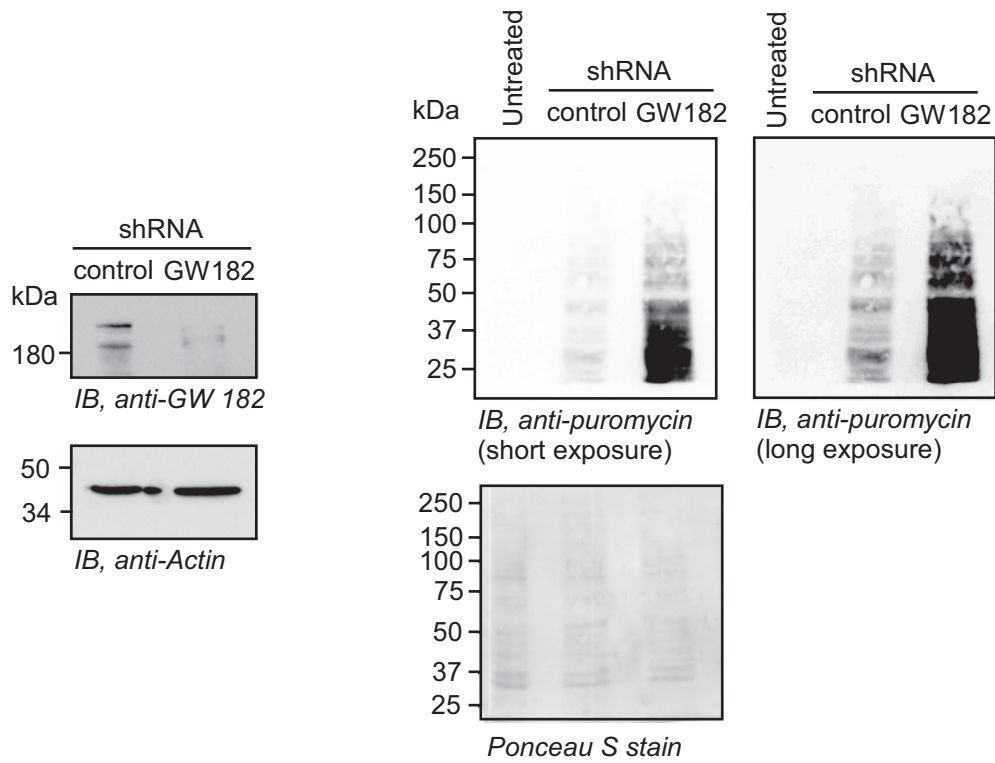

**Figure EV5. Validation of ribopuromylation (related to Fig 8).**

Ribopuromylation assay showing global translation profile of GW182 knockdown HeLa cells. GW182 knockdown was confirmed by Western blot (left). Source data are available online for this figure.
