# Supplementary material for: Let‐7a‐regulated translational readthrough of mammalian AGO1 generates a microRNA pathway inhibitor
Source: PubMed Central journal article supplement (PMC6694283; doi:10.15252/embj.2018100727), 2019-07-22
Supplement: EMBJ-38-e100727-s005.pdf [file EMBJ-38-e100727-s005.pdf]

Fig 1 C

|              |             |             |             |
|--------------|-------------|-------------|-------------|
| <i>AGO1</i>  | <i>AGO1</i> | <i>AGO1</i> |             |
| TGA          | TGA         | GCA         |             |
| $\Delta$ ISR | ISR         | ISR         | Only        |
| <i>Fluc</i>  | <i>Fluc</i> | <i>Fluc</i> | <i>RLuc</i> |

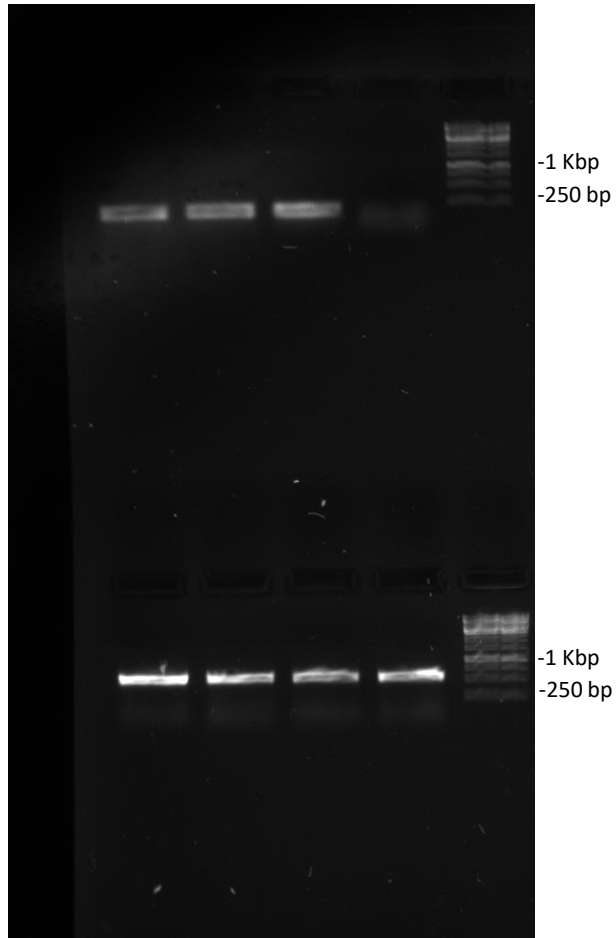

*FLuc*

*GAPDH*

Fig 1 D

*GAPDH*

*FLuc*

AGO1 TGA ΔISR Fluc  
AGO1 TGA ISR Fluc  
AGO1 TAG ISR Fluc  
AGO1 TAA ISR Fluc  
AGO1 GCA ISR Fluc

AGO1 TGA ΔISR Fluc  
AGO1 TGA ISR Fluc  
AGO1 TAG ISR Fluc  
AGO1 TAA ISR Fluc  
AGO1 GCA ISR Fluc

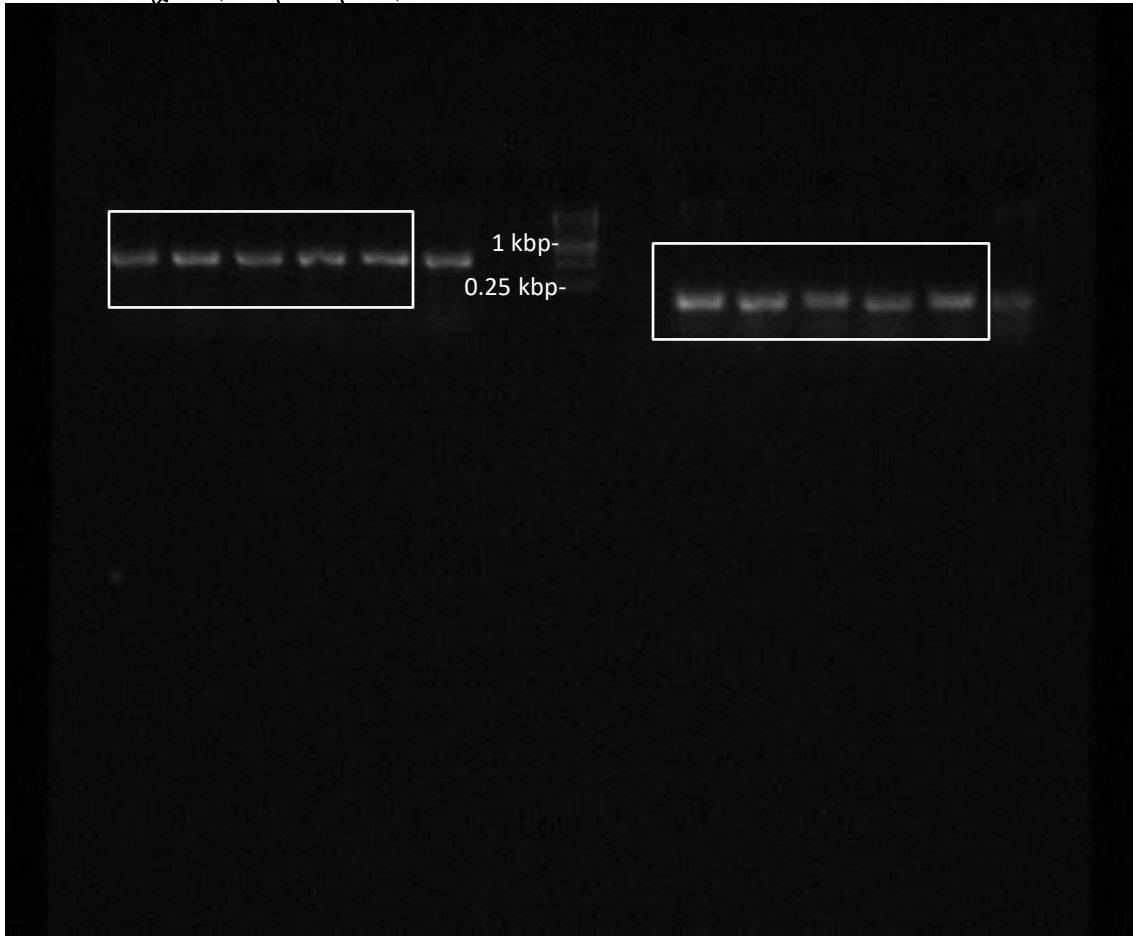

Fig 1 E

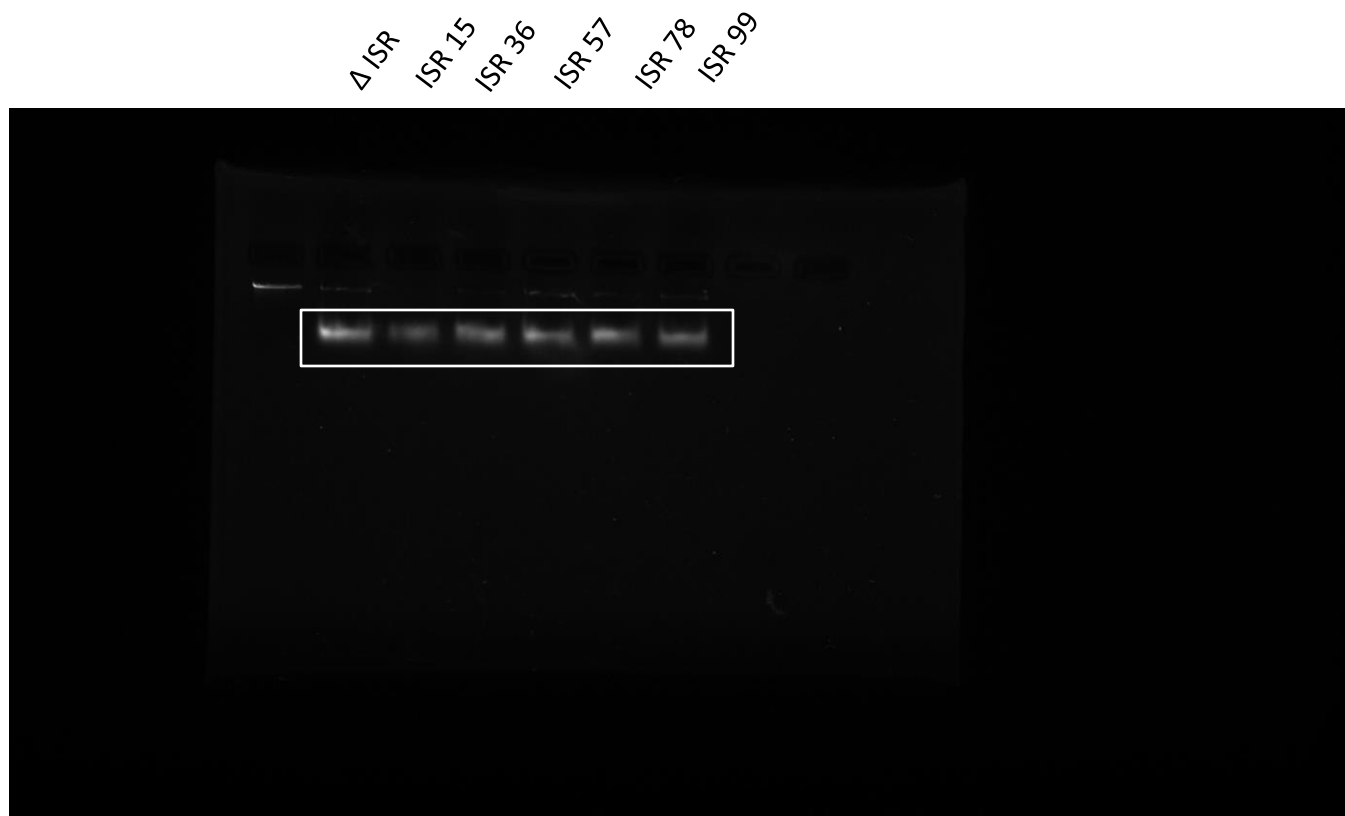

| <b>FIG_1_C</b>                 |                  |                |            |  |
|--------------------------------|------------------|----------------|------------|--|
|                                |                  |                |            |  |
|                                | <b>Fluc/Rluc</b> | <b>Average</b> | <b>SEM</b> |  |
| <b>AGO1 TGA ISR Fluc</b>       | 2.468487         |                |            |  |
|                                | 2.534009         | 2.356964       | 0.1455     |  |
|                                | 2.068396         |                |            |  |
| <b>AGO1 GCA ISR Fluc</b>       | 9.529091         |                |            |  |
|                                | 9.243573         | 9.767424       | 0.3899     |  |
|                                | 10.52961         |                |            |  |
| <b>AGO1 TGA Delta ISR Fluc</b> | 0.163424         |                |            |  |
|                                | 0.173405         | 0.142104       | 0.0265     |  |
|                                | 0.089482         |                |            |  |
| <b>only Rluc</b>               | 0.131902         | 0.126549       | 3.03E-03   |  |
|                                | 0.121429         |                |            |  |
|                                | 0.126316         |                |            |  |
|                                |                  |                |            |  |
| <b>P-value:</b>                | 0.0001           |                |            |  |

| <b>FIG_1_D</b>                 |                  |                |            |
|--------------------------------|------------------|----------------|------------|
|                                | <b>Fluc/Rluc</b> | <b>Average</b> | <b>SEM</b> |
| <b>AGO1 TGA Delta ISR Fluc</b> | 0.135218818      | 0.143158892    | 3.97E-03   |
|                                | 0.147237893      |                |            |
|                                | 0.147019965      |                |            |
| <b>AGO1 TGA ISR Fluc</b>       | 1.822185133      | 1.985560101    | 0.1        |
|                                | 1.967191884      |                |            |
|                                | 2.167303285      |                |            |
| <b>AGO1 GCA ISR Fluc</b>       | 4.461999689      | 5.794930634    | 0.7175     |
|                                | 6.001241745      |                |            |
|                                | 6.92155047       |                |            |
| <b>AGO1 TAG ISR Fluc</b>       | 0.496834376      | 0.569640122    | 0.0486     |
|                                | 0.55038297       |                |            |
|                                | 0.66170302       |                |            |
| <b>AGO1 TAA ISR Fluc</b>       | 0.523809524      | 0.591544973    | 0.084      |
|                                | 0.492350103      |                |            |
|                                | 0.758475291      |                |            |
|                                |                  |                |            |
|                                |                  |                |            |
|                                |                  |                |            |
|                                |                  |                |            |
|                                |                  |                |            |
|                                | <b>P-value:</b>  |                |            |
| TGA and TAA                    | 0.0004           |                |            |
| TGA and TAG                    | 0.0002           |                |            |

| <b>FIG_1_E</b>   |              |              |              |                |            |
|------------------|--------------|--------------|--------------|----------------|------------|
|                  | <b>Rep-1</b> | <b>Rep-2</b> | <b>Rep-3</b> | <b>Average</b> | <b>SEM</b> |
| <b>delta isr</b> | 20           | 18           | 16           | 18             | 1.1547     |
| <b>isr15</b>     | 21           | 19           | 18           | 19.3333        | 0.8819     |
| <b>isr36</b>     | 65           | 41           | 32           | 46             | 9.8489     |
| <b>isr57</b>     | 791          | 492          | 331          | 538            | 134.7677   |
| <b>isr78</b>     | 516          | 506          | 445          | 489            | 22.1886    |
| <b>isr99</b>     | 447          | 242          | 248          | 312.3333       | 67.3556    |
|                  |              |              |              |                |            |
| <b>P-value:</b>  |              |              |              |                |            |
| delta isr        | 0.012        |              |              |                |            |
| isr15            | 0.012        |              |              |                |            |
| isr36            | 0.017        |              |              |                |            |

| <b>FIG_1_G</b>                |              |              |              |                |            |
|-------------------------------|--------------|--------------|--------------|----------------|------------|
|                               | <b>Rep-1</b> | <b>Rep-2</b> | <b>Rep-3</b> | <b>Average</b> | <b>SEM</b> |
| <b>Ago1 tga delta isr gfp</b> | 468          | 493          | 507          | 489.3333       | 11.4066    |
| <b>ago1 tga isr gfp</b>       | 1664         | 1647         | 2498         | 1936.3333      | 280.8762   |
| <b>ago1 gca isr gfp</b>       | 7150         | 5601         | 6415         | 6388.6667      | 447.3516   |
|                               |              |              |              |                |            |
| <b>P-value:</b>               | 0.007        |              |              |                |            |
|                               |              |              |              |                |            |
