# Supplementary material for: Let‐7a‐regulated translational readthrough of mammalian AGO1 generates a microRNA pathway inhibitor
Source: PubMed Central journal article supplement (PMC6694283; doi:10.15252/embj.2018100727), 2019-07-22
Supplement: EMBJ-38-e100727-s006.pdf [file EMBJ-38-e100727-s006.pdf]

Fig 2 B

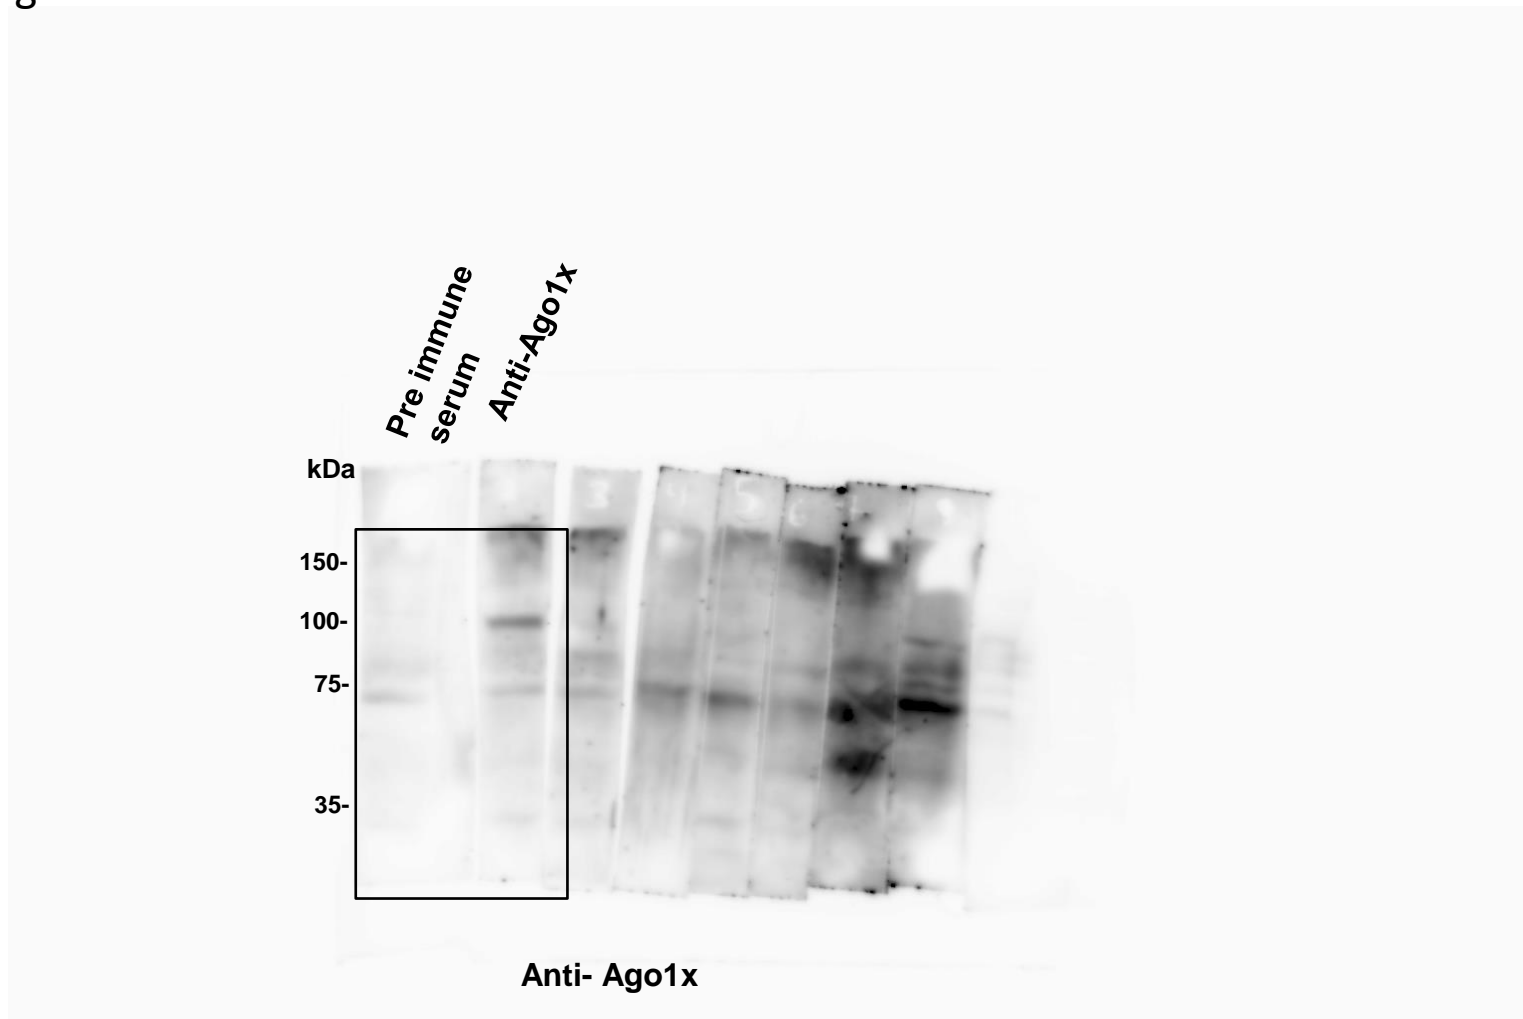

Fig 2 C

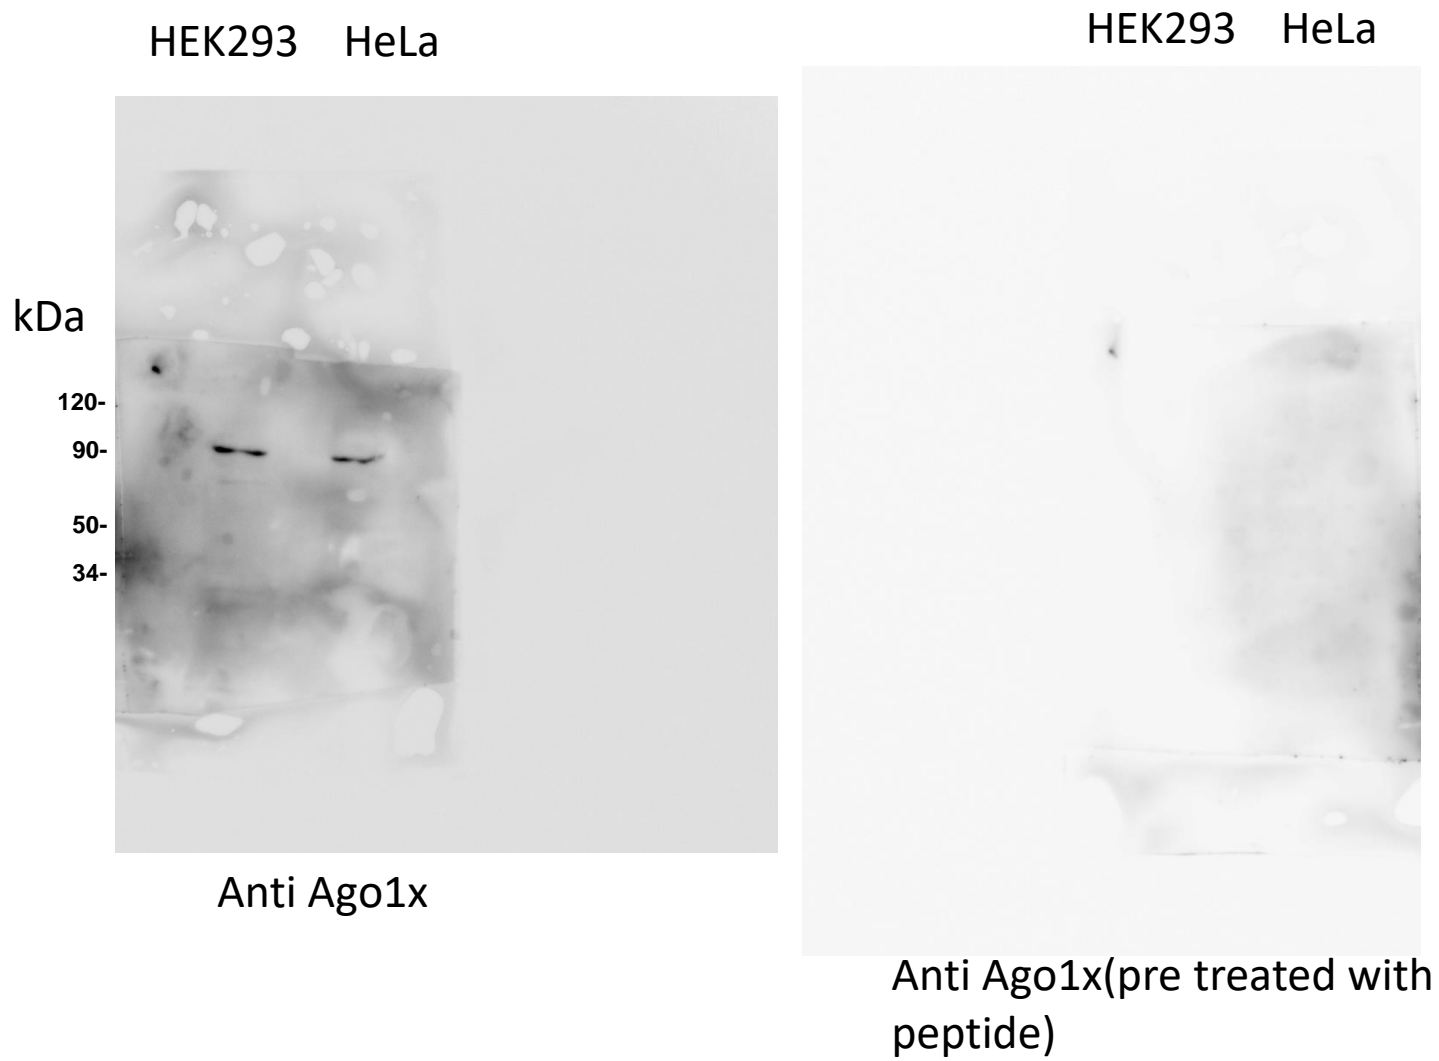

Fig 2 C

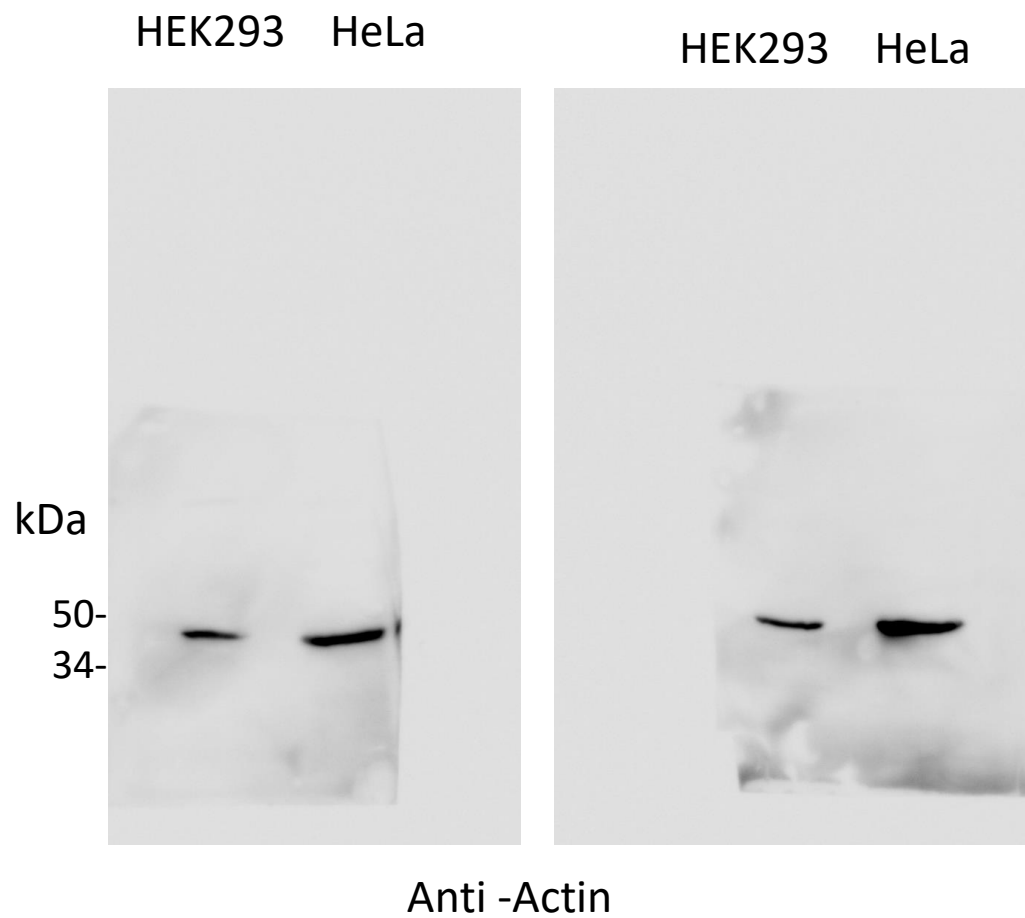

Fig 2 D

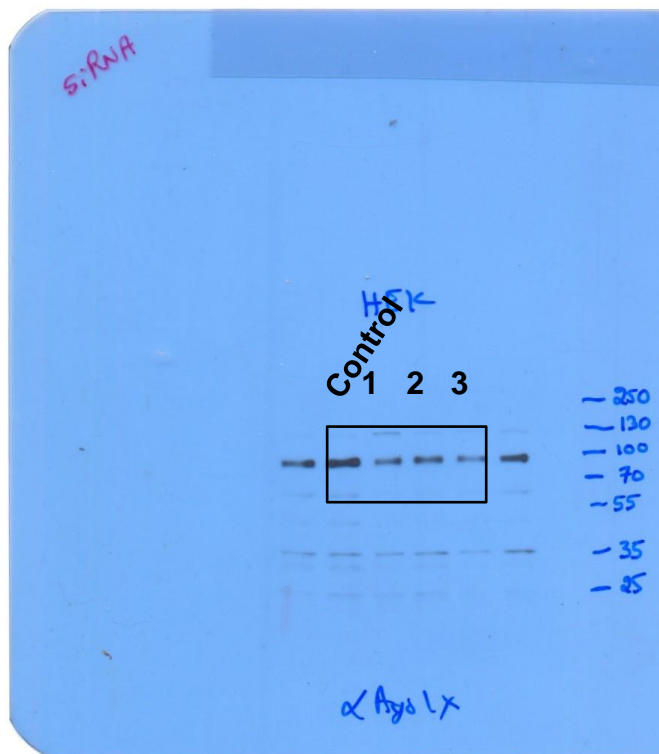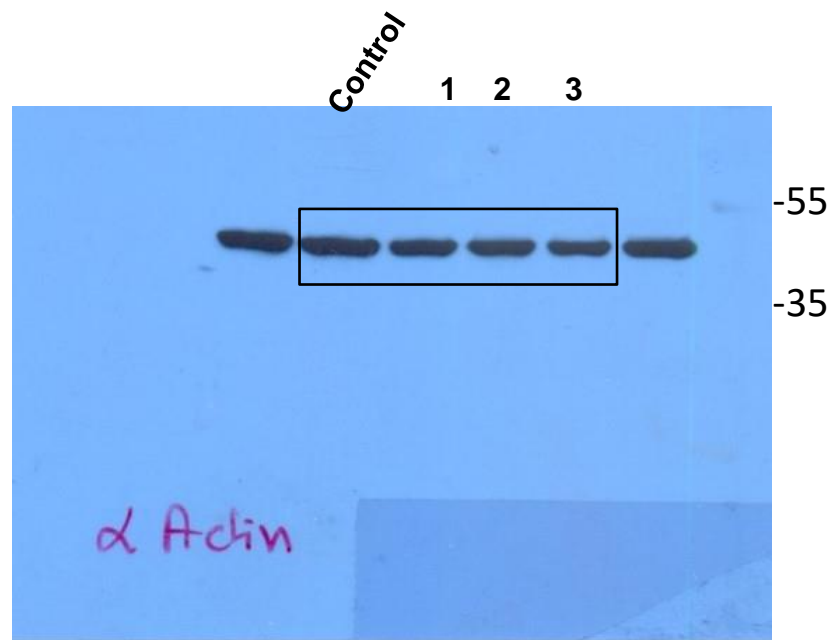

Fig 2 E

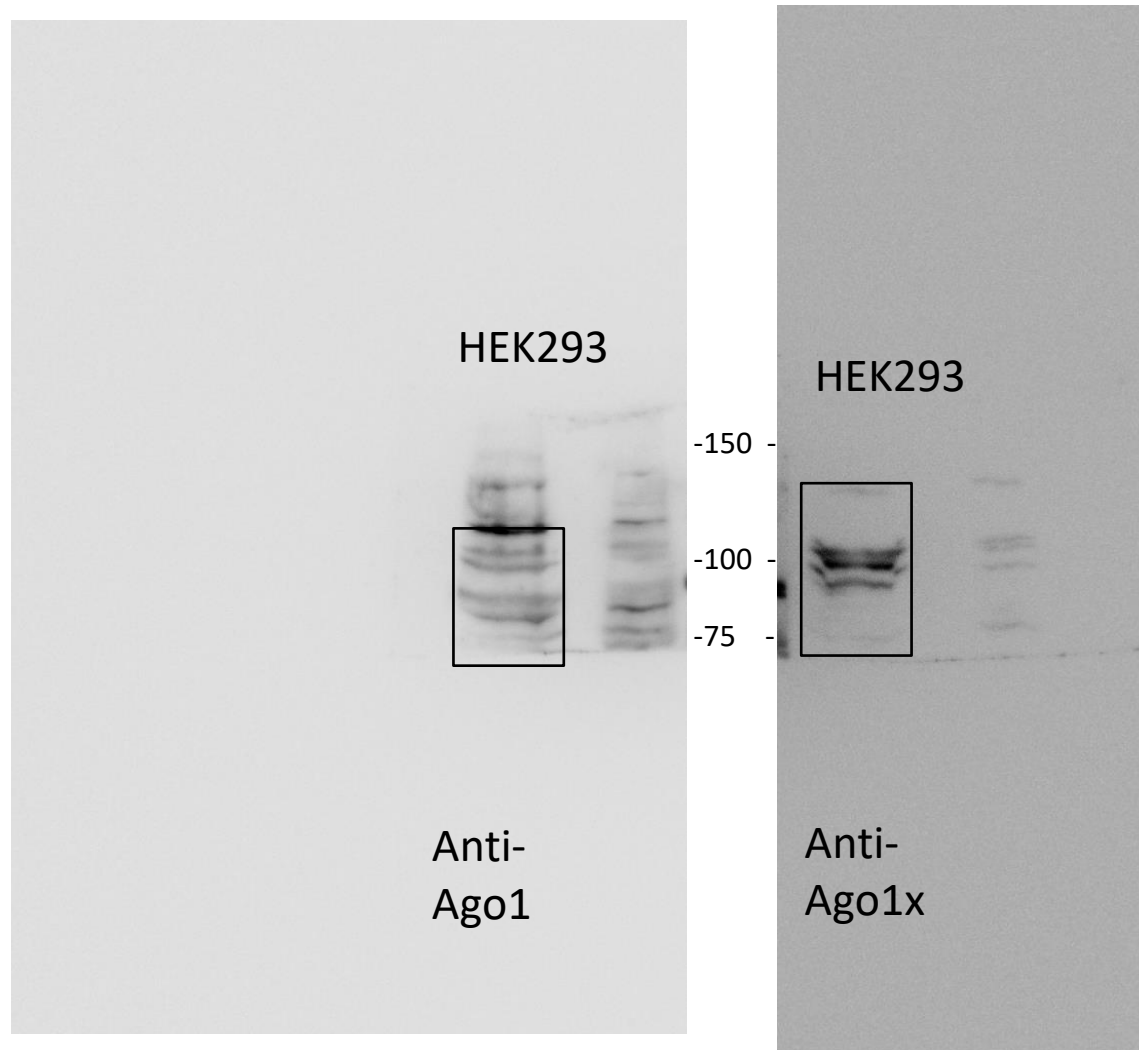

Fig 2 F

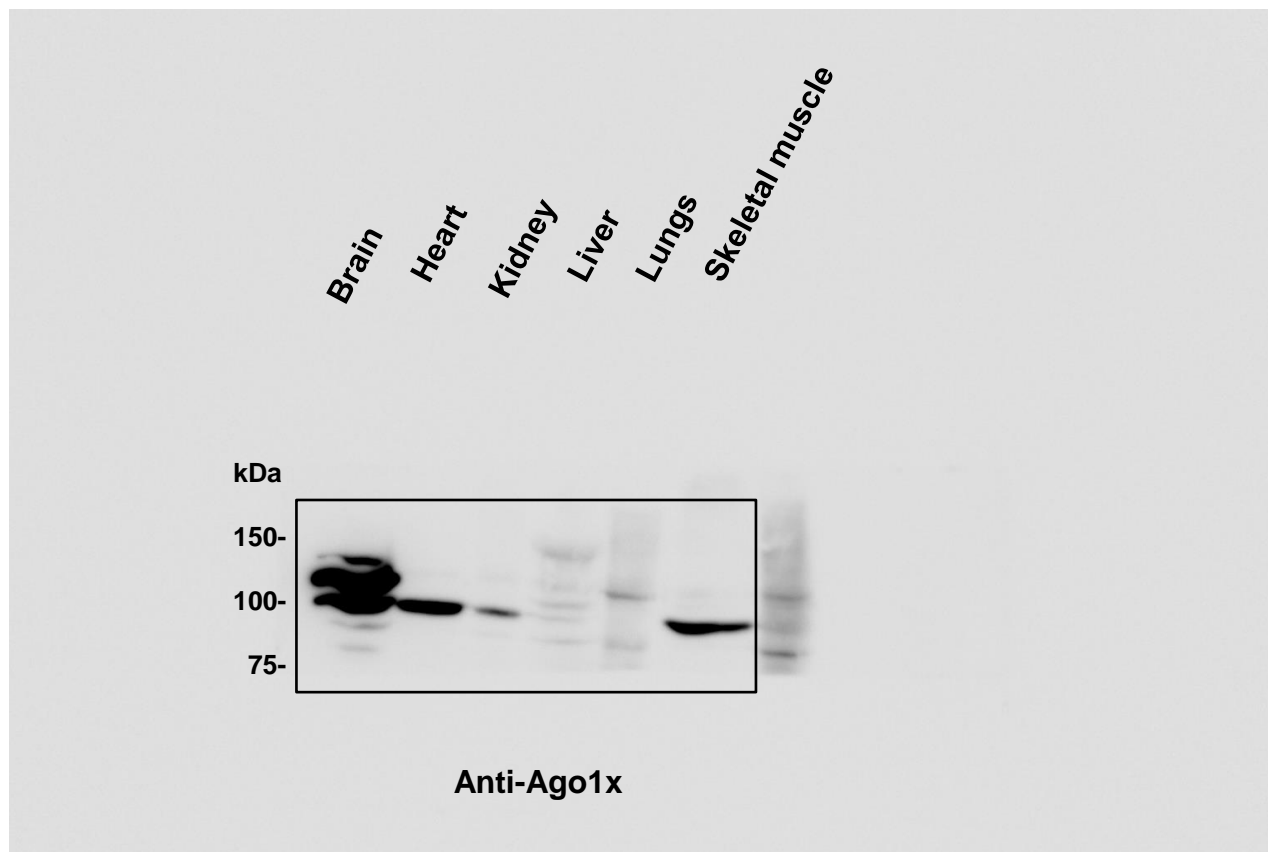

Fig 2 G

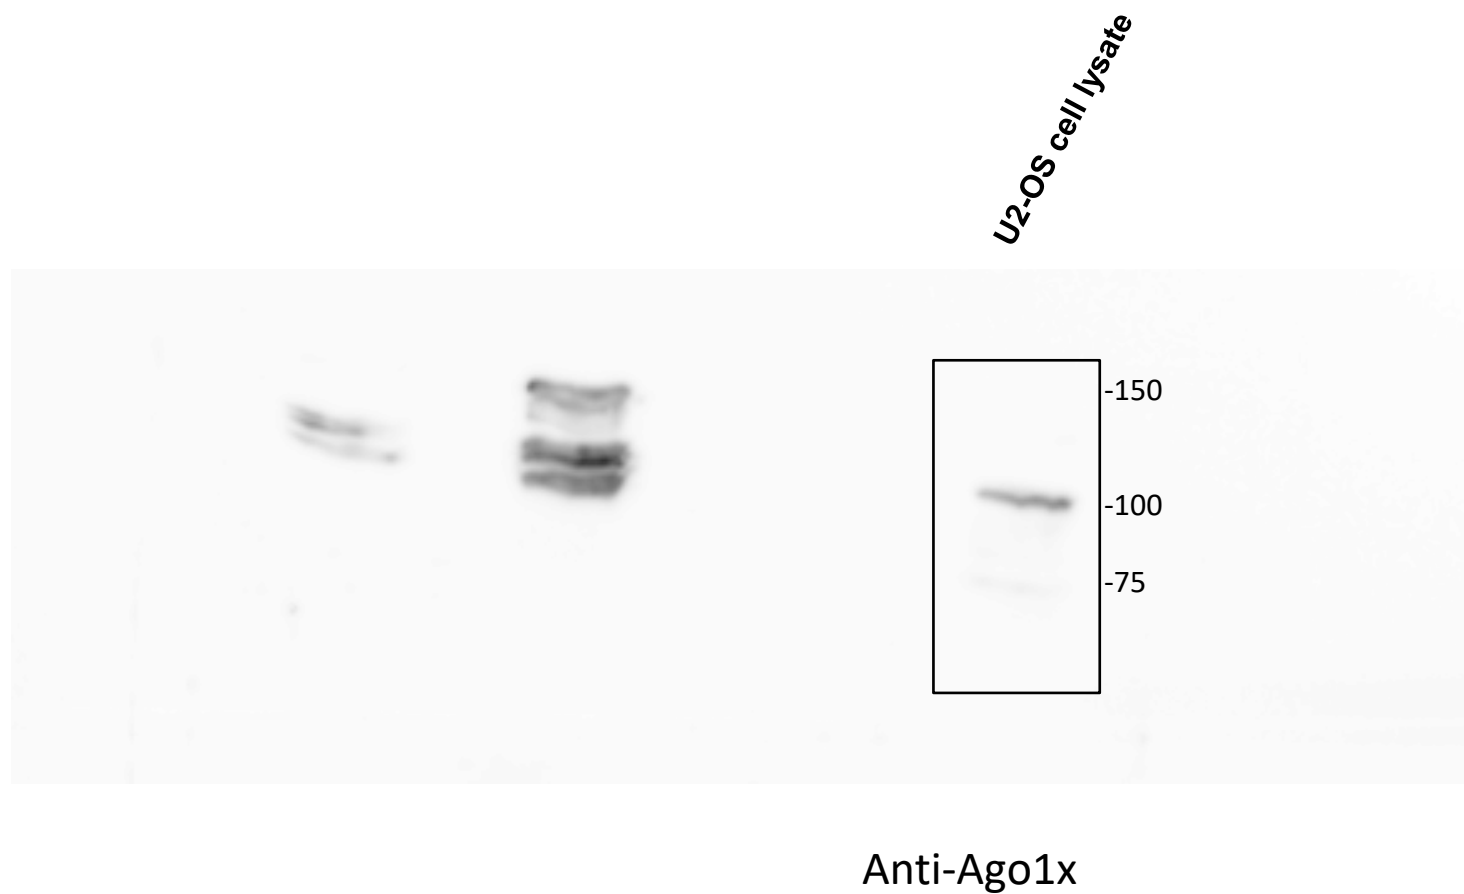

| FIG_2_D             |        |        |        |         |          |          |
|---------------------|--------|--------|--------|---------|----------|----------|
| AGO1                |        |        |        | average | sem      | P-value: |
| <b>Control</b>      | 1      | 0.9406 | 1.0992 | 1.0132  | 0.0801   | <0.0001  |
| <b>Ago1 siRNA 1</b> | 0.0415 | 0.0571 | 0.1068 | 0.0685  | 0.0341   |          |
| <b>Ago1 siRNA 2</b> | 0.0491 | 0.087  | 0.1139 | 0.0833  | 0.0325   |          |
| <b>Ago1 siRNA 3</b> | 0.0358 | 0.0214 | 0.0304 | 0.0292  | 7.28E-03 |          |



| <b>FIG_2_E</b> |             |              |
|----------------|-------------|--------------|
|                | <b>Ago1</b> | <b>Ago1x</b> |
| <b>Rep-1</b>   | 51.3162     | 48.6838      |
| <b>Rep-2</b>   | 63.5097     | 36.4903      |
| <b>Rep-3</b>   | 68.7994     | 31.2006      |
|                |             |              |
| <b>average</b> | 61.20843    | 38.79157     |
