# Supplementary material for: Let‐7a‐regulated translational readthrough of mammalian AGO1 generates a microRNA pathway inhibitor
Source: PubMed Central journal article supplement (PMC6694283; doi:10.15252/embj.2018100727), 2019-07-22
Supplement: EMBJ-38-e100727-s007.pdf [file EMBJ-38-e100727-s007.pdf]

Fig 3B

Non-specific inhibitor  
Let7a inhibitor

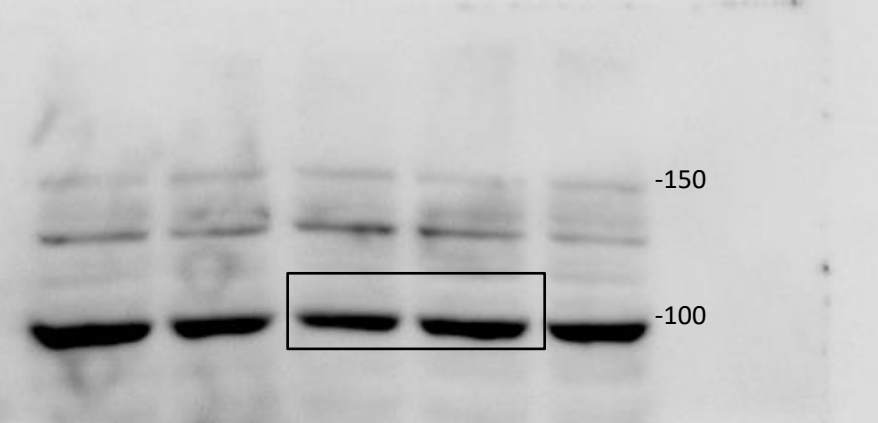

Anti-Ago1

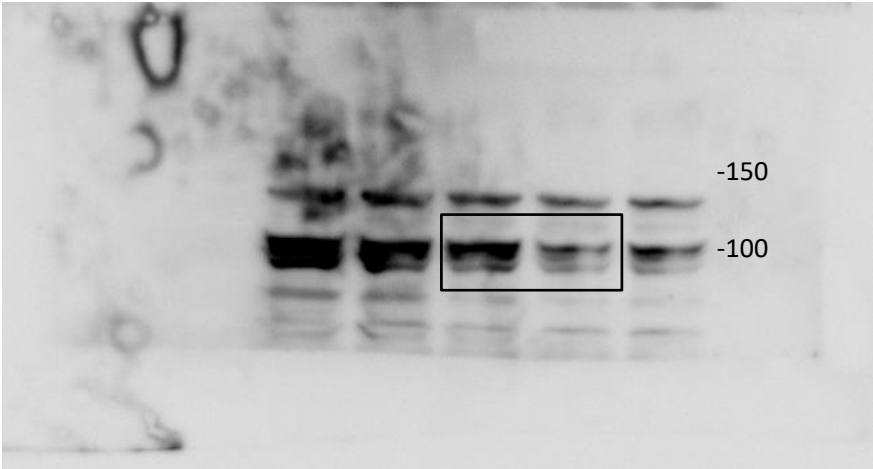

Anti-Ago1x

Fig 3C

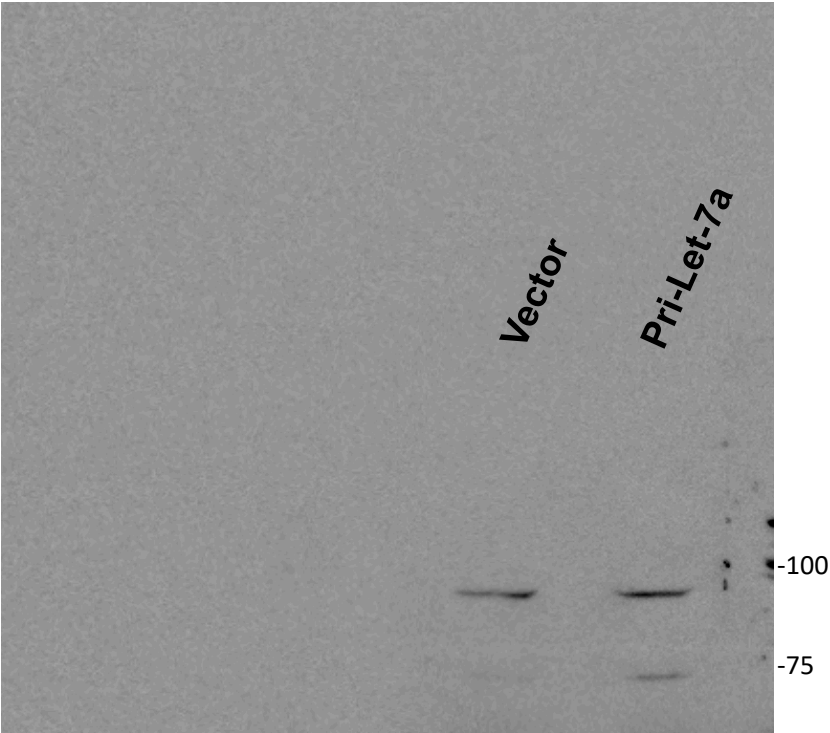

Anti-Ago1

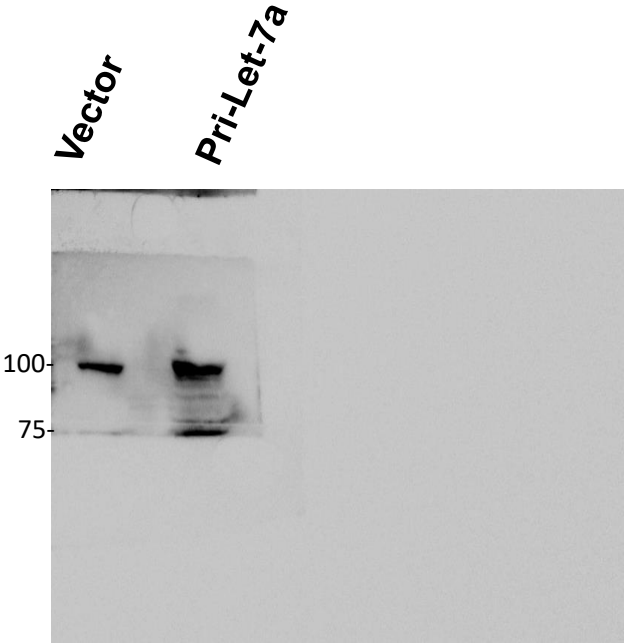

Anti-Ago1x

Fig 3D

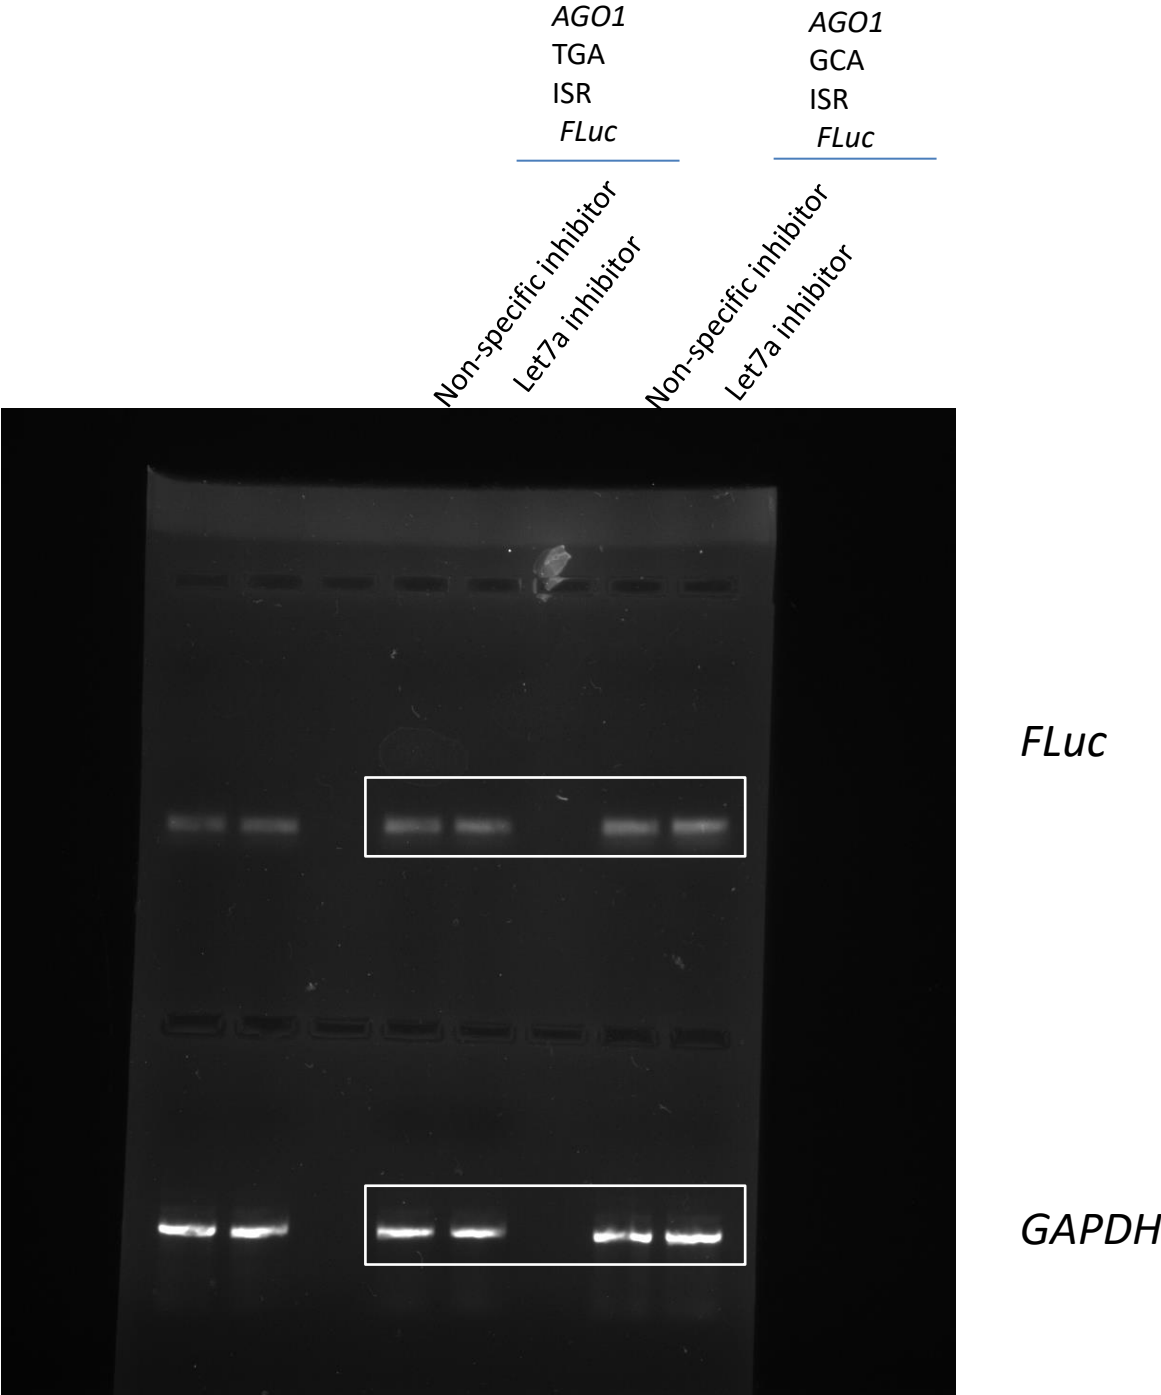

Fig 3E

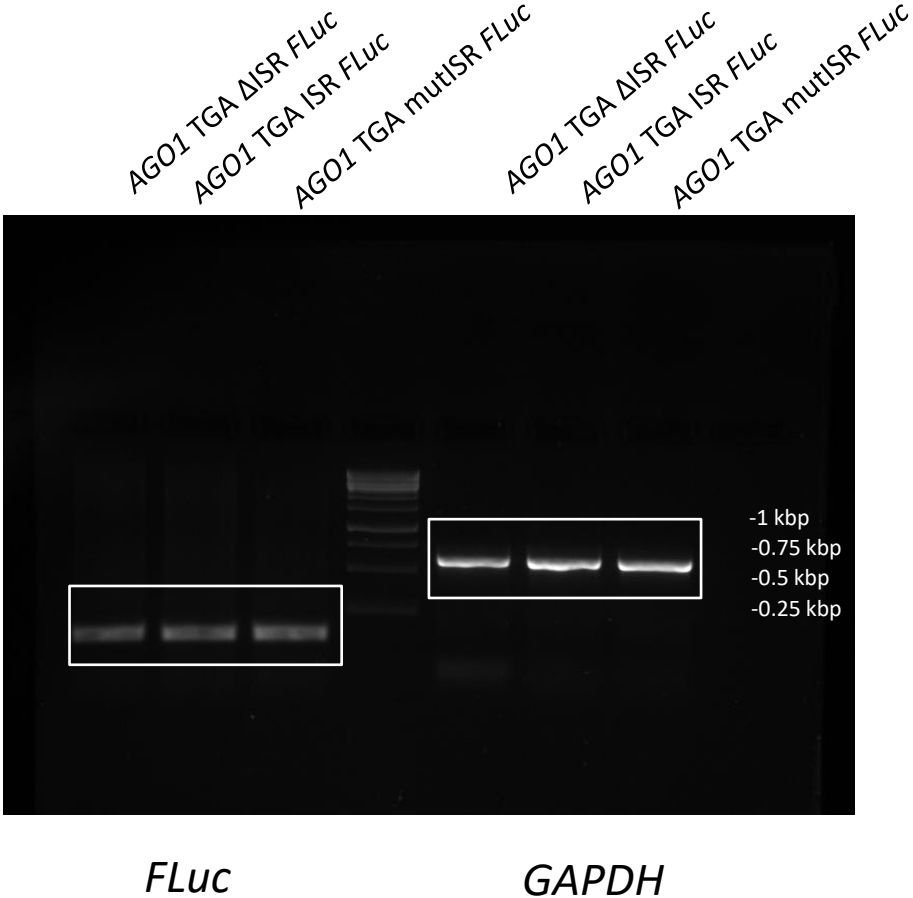

Fig 3F

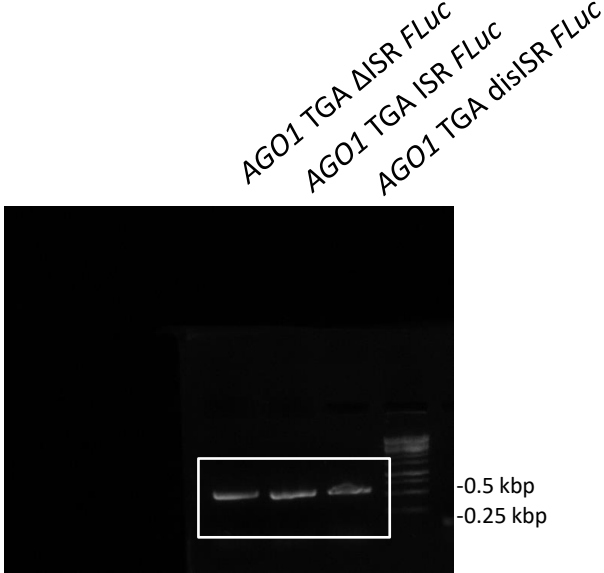

*GAPDH*

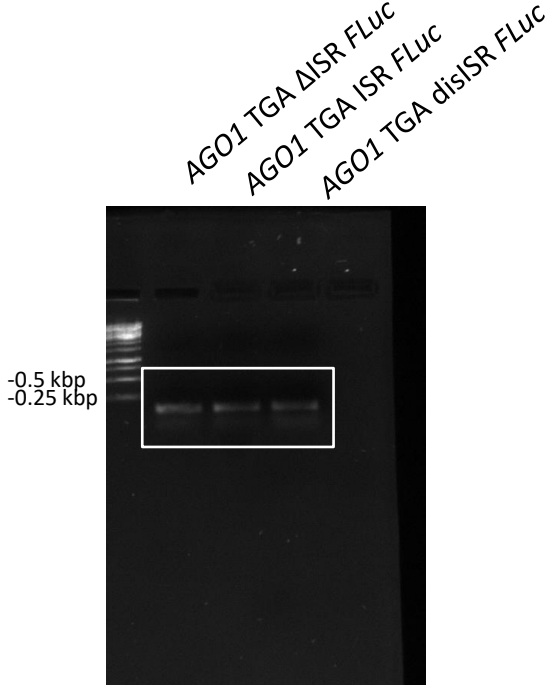

*FLuc*

|                                         |                             |              |              |                 |            |
|-----------------------------------------|-----------------------------|--------------|--------------|-----------------|------------|
| <b>FIG_3_B</b>                          |                             |              |              |                 |            |
|                                         | <b>Normalised Intensity</b> |              |              |                 |            |
|                                         | <b>Rep-1</b>                | <b>Rep-2</b> | <b>Rep-3</b> | <b>Average</b>  | <b>SEM</b> |
| <b>AGO1 with LET-7a Inhibitor</b>       | 1.044109                    | 1.437819     | 0.670709     | 1.050879        | 0.2215     |
| <b>AGO1 with Non-Specific Inhibitor</b> | 1                           | 1            | 1            | 1               | 0          |
|                                         |                             |              |              |                 |            |
| <b>AGO1x with LET-7a Inhibitor</b>      | 0.347928                    | 0.482894     | 0.527353     | 0.452725        | 0.0539     |
| <b>AGO1x Non-Specific Inhibitor</b>     | 1                           | 1            | 1            | 1               | 0          |
|                                         |                             |              |              |                 |            |
|                                         |                             |              |              |                 |            |
|                                         |                             |              |              | <b>P-value:</b> | 0.01       |
|                                         |                             |              |              |                 |            |

| FIG_3_C      |                        | Normalised Intensity |             |          |                 |        |
|--------------|------------------------|----------------------|-------------|----------|-----------------|--------|
|              |                        | Rep-1                | Rep-2       | Rep-3    | Average         | SEM    |
| <b>Ago1</b>  | <b>Vector</b>          | 1                    | 1           | 1        | 1               | 0      |
|              | <b>Let-7a over-exp</b> | 0.430604             | 1.333301193 | 1.407001 | 1.057           | 0.3139 |
| <b>Ago1x</b> | <b>Vector</b>          | 1                    | 1           | 1        | 1               | 0      |
|              | <b>Let-7a over-exp</b> | 2.283398             | 2.535463914 | 2.713007 | 2.5106          | 0.1246 |
|              |                        |                      |             |          | <b>P-value:</b> | 0.007  |

|                               |  |                  |                |            |                 |
|-------------------------------|--|------------------|----------------|------------|-----------------|
| <b>FIG_3_D</b>                |  |                  |                |            |                 |
| <b>Let-7a inh. 10 nm</b>      |  |                  |                |            |                 |
|                               |  | <b>Fluc/Rluc</b> | <b>Average</b> | <b>SEM</b> |                 |
| <b>AGO1 TGA ISR Fluc</b>      |  | 0.000201         | 0.000583       | 3.39E-04   |                 |
|                               |  | 0.000288         |                |            |                 |
|                               |  | 0.001258         |                |            |                 |
| <b>AGO1 GCA ISR Fluc</b>      |  | 0.003091         | 0.013113       | 6.77E-03   |                 |
|                               |  | 0.010229         |                |            |                 |
|                               |  | 0.026018         |                |            |                 |
|                               |  |                  |                |            |                 |
|                               |  |                  |                |            | <b>P-value:</b> |
|                               |  |                  |                |            | 0.027           |
|                               |  |                  |                |            |                 |
| <b>non-specific inh. 10nm</b> |  |                  |                |            |                 |
| <b>AGO1 TGA ISR Fluc</b>      |  | 0.001905         | 0.002458       | 4.35E-04   |                 |
|                               |  | 0.002153         |                |            |                 |
|                               |  | 0.003315         |                |            |                 |
| <b>AGO1 GCA ISR Fluc</b>      |  | 0.010621         | 0.011665       | 6.13E-04   |                 |
|                               |  | 0.011631         |                |            |                 |
|                               |  | 0.012744         |                |            |                 |



|                                |  |                  |                |            |  |                 |       |
|--------------------------------|--|------------------|----------------|------------|--|-----------------|-------|
| <b>FIG_3_E</b>                 |  |                  |                |            |  |                 |       |
|                                |  |                  |                |            |  |                 |       |
|                                |  | <b>Fluc/Rluc</b> | <b>Average</b> | <b>SEM</b> |  |                 |       |
| <b>AGO1 TGA Delta ISR Fluc</b> |  | 2.77941E-05      | 2.99675E-05    | 1.49E-06   |  |                 |       |
|                                |  | 3.28313E-05      |                |            |  |                 |       |
|                                |  | 2.92771E-05      |                |            |  |                 |       |
| <b>AGO1 TGA ISR Fluc</b>       |  | 0.00044249       | 0.000615335    | 8.67E-05   |  |                 |       |
|                                |  | 0.000713433      |                |            |  |                 |       |
|                                |  | 0.000690083      |                |            |  |                 |       |
| <b>AGO1 TGA Mut. ISR Fluc</b>  |  | 0.000175624      | 0.000182688    | 9.82E-06   |  | <b>P-value:</b> | 0.008 |
|                                |  | 0.000170343      |                |            |  |                 |       |
|                                |  | 0.000202096      |                |            |  |                 |       |

|                                |  |                  |                |            |  |                 |          |
|--------------------------------|--|------------------|----------------|------------|--|-----------------|----------|
| <b>FIG_3_F</b>                 |  |                  |                |            |  |                 |          |
|                                |  |                  |                |            |  |                 |          |
|                                |  | <b>Fluc/Rluc</b> | <b>Average</b> | <b>SEM</b> |  |                 |          |
| <b>AGO1 TGA Delta ISR Fluc</b> |  | 6.93E-05         | 7.05534E-05    | 6.49E-07   |  |                 |          |
|                                |  | 7.14E-05         |                |            |  |                 |          |
|                                |  | 7.09E-05         |                |            |  |                 |          |
| <b>AGO1 TGA ISR Fluc</b>       |  | 0.000977         | 0.000902616    | 3.97E-05   |  |                 |          |
|                                |  | 0.000888         |                |            |  |                 |          |
|                                |  | 0.000843         |                |            |  |                 |          |
| <b>AGO1 TGA disISR Fluc</b>    |  | 0.000269         | 0.000262889    | 5.79E-06   |  | <b>P-value:</b> | < 0.0001 |
|                                |  | 0.000251         |                |            |  |                 |          |
|                                |  | 0.000268         |                |            |  |                 |          |
