# Supplementary material for: Let‐7a‐regulated translational readthrough of mammalian AGO1 generates a microRNA pathway inhibitor
Source: PubMed Central journal article supplement (PMC6694283; doi:10.15252/embj.2018100727), 2019-07-22
Supplement: EMBJ-38-e100727-s008.pdf [file EMBJ-38-e100727-s008.pdf]

Fig 4 A

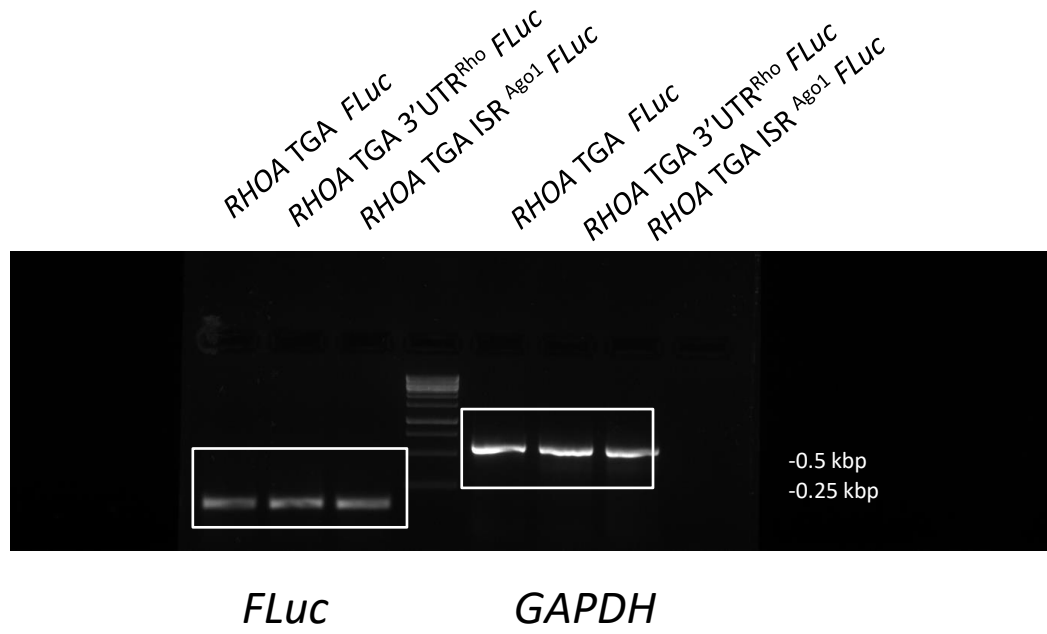

Fig 4 C

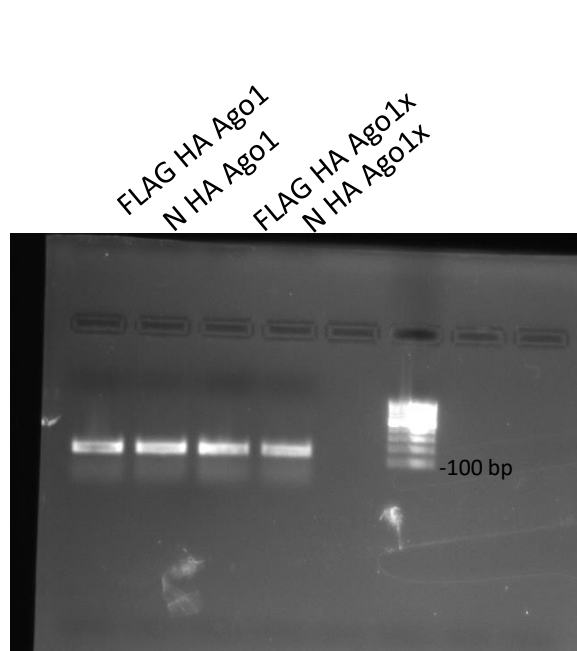

*FLuc*

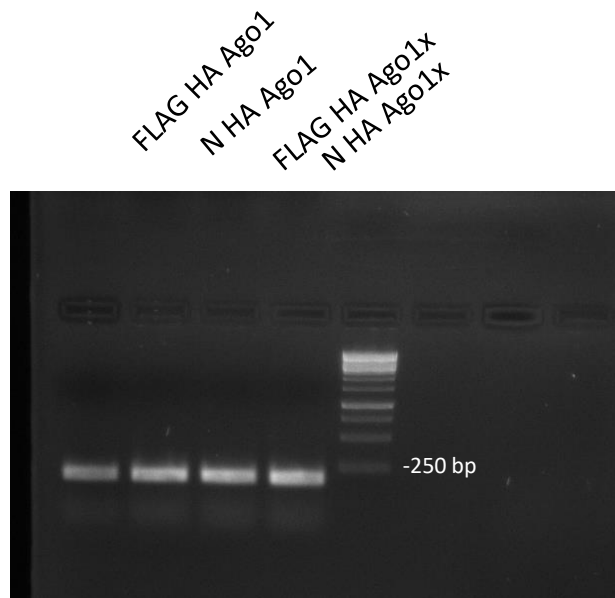

*Actin*

| FIG_4_A                        |             |             |          |  |                 |         |
|--------------------------------|-------------|-------------|----------|--|-----------------|---------|
|                                |             |             |          |  |                 |         |
|                                | Fluc/Rluc   | Average     | SEM      |  |                 |         |
| <b>RHOA TGA Fluc</b>           | 3.67688E-05 | 3.40642E-05 | 8.18E-06 |  |                 |         |
|                                | 1.87463E-05 |             |          |  |                 |         |
|                                | 4.66775E-05 |             |          |  |                 |         |
| <b>RHOA TGA 3'UTR RHO Fluc</b> | 3.19249E-05 | 4.20164E-05 | 1.09E-05 |  |                 |         |
|                                | 3.03944E-05 |             |          |  |                 |         |
|                                | 6.37298E-05 |             |          |  |                 |         |
| <b>RHOA TGA ISR AGO1 Fluc</b>  | 0.000258907 | 0.000254826 | 2.79E-06 |  | <b>P-value:</b> | <0.0001 |
|                                | 0.000256071 |             |          |  |                 |         |
|                                | 0.000249501 |             |          |  |                 |         |
|                                |             |             |          |  |                 |         |

| FIG_4_B                           |          |                  |                |            |                 |        |
|-----------------------------------|----------|------------------|----------------|------------|-----------------|--------|
| <b>in vitro translation</b>       |          |                  |                |            |                 |        |
|                                   |          | <b>Fluc/Rluc</b> | <b>Average</b> | <b>SEM</b> |                 |        |
| <b>Rluc TAA non-specific Fluc</b> | 0.001355 | 0.001301         | 3.40E-05       |            |                 |        |
|                                   | 0.001308 |                  |                |            |                 |        |
|                                   | 0.001238 |                  |                |            |                 |        |
| <b>Rluc TAA ISR Fluc</b>          | 0.008087 | 0.007289         | 4.14E-04       |            | <b>P-value:</b> | 0.0001 |
|                                   | 0.007081 |                  |                |            |                 |        |
|                                   | 0.0067   |                  |                |            |                 |        |
| <b>Rluc TCA ISR Fluc</b>          | 0.084791 | 0.082046         | 6.17E-03       |            |                 |        |
|                                   | 0.070251 |                  |                |            |                 |        |
|                                   | 0.091096 |                  |                |            |                 |        |
| <b>transfection</b>               |          |                  |                |            |                 |        |
|                                   |          | <b>Fluc/Rluc</b> | <b>Average</b> | <b>SEM</b> |                 |        |
| <b>Rluc TAA non-specific Fluc</b> | 0.0044   | 0.004848         | 8.06E-04       |            |                 |        |
|                                   | 0.006412 |                  |                |            |                 |        |
|                                   | 0.003731 |                  |                |            |                 |        |
| <b>Rluc TAA ISR Fluc</b>          | 0.011739 | 0.013515         | 1.39E-03       |            |                 |        |
|                                   | 0.01625  |                  |                |            | <b>P-value:</b> | 0.006  |
|                                   | 0.012556 |                  |                |            |                 |        |
| <b>Rluc TCA ISR Fluc</b>          | 0.209804 | 0.200688         | 0.0181         |            |                 |        |
|                                   | 0.226506 |                  |                |            |                 |        |
|                                   | 0.165753 |                  |                |            |                 |        |

| FIG_4_C             |                  |                |            |                 |                       |  |
|---------------------|------------------|----------------|------------|-----------------|-----------------------|--|
|                     |                  |                |            |                 |                       |  |
|                     | <b>Fluc/Rluc</b> | <b>Average</b> | <b>SEM</b> |                 |                       |  |
| <b>nha ago1</b>     | 0.00092          | 0.000843       | 1.19E-04   |                 |                       |  |
|                     | 0.001            |                |            |                 |                       |  |
|                     | 0.000609         |                |            |                 |                       |  |
|                     |                  |                |            |                 |                       |  |
|                     | <b>Fluc/Rluc</b> | <b>Average</b> | <b>SEM</b> |                 |                       |  |
| <b>nha ago1x</b>    | 0.000506         | 0.000389       | 6.49E-05   |                 |                       |  |
|                     | 0.00038          |                |            |                 |                       |  |
|                     | 0.000282         |                |            |                 |                       |  |
|                     |                  |                |            |                 |                       |  |
|                     | <b>Fluc/Rluc</b> | <b>Average</b> | <b>SEM</b> |                 |                       |  |
| <b>flag ha ago1</b> | 0.000347         | 0.00036        | 1.20E-05   |                 |                       |  |
|                     | 0.000384         |                |            | <b>P-value:</b> | 0.016                 |  |
|                     | 0.000348         |                |            |                 |                       |  |
|                     |                  |                |            |                 |                       |  |
|                     | <b>Fluc/Rluc</b> | <b>Average</b> | <b>SEM</b> |                 |                       |  |
| <b>fha ago1x</b>    | 4.77E-05         | 5.98E-05       | 6.25E-06   |                 |                       |  |
|                     | 6.85E-05         |                |            | <b>P-value:</b> | 0.0355                |  |
|                     | 6.33E-05         |                |            |                 | with welch correction |  |
|                     |                  |                |            |                 |                       |  |
