# Supplementary material for: Let‐7a‐regulated translational readthrough of mammalian AGO1 generates a microRNA pathway inhibitor
Source: PubMed Central journal article supplement (PMC6694283; doi:10.15252/embj.2018100727), 2019-07-22

Fig 6 A

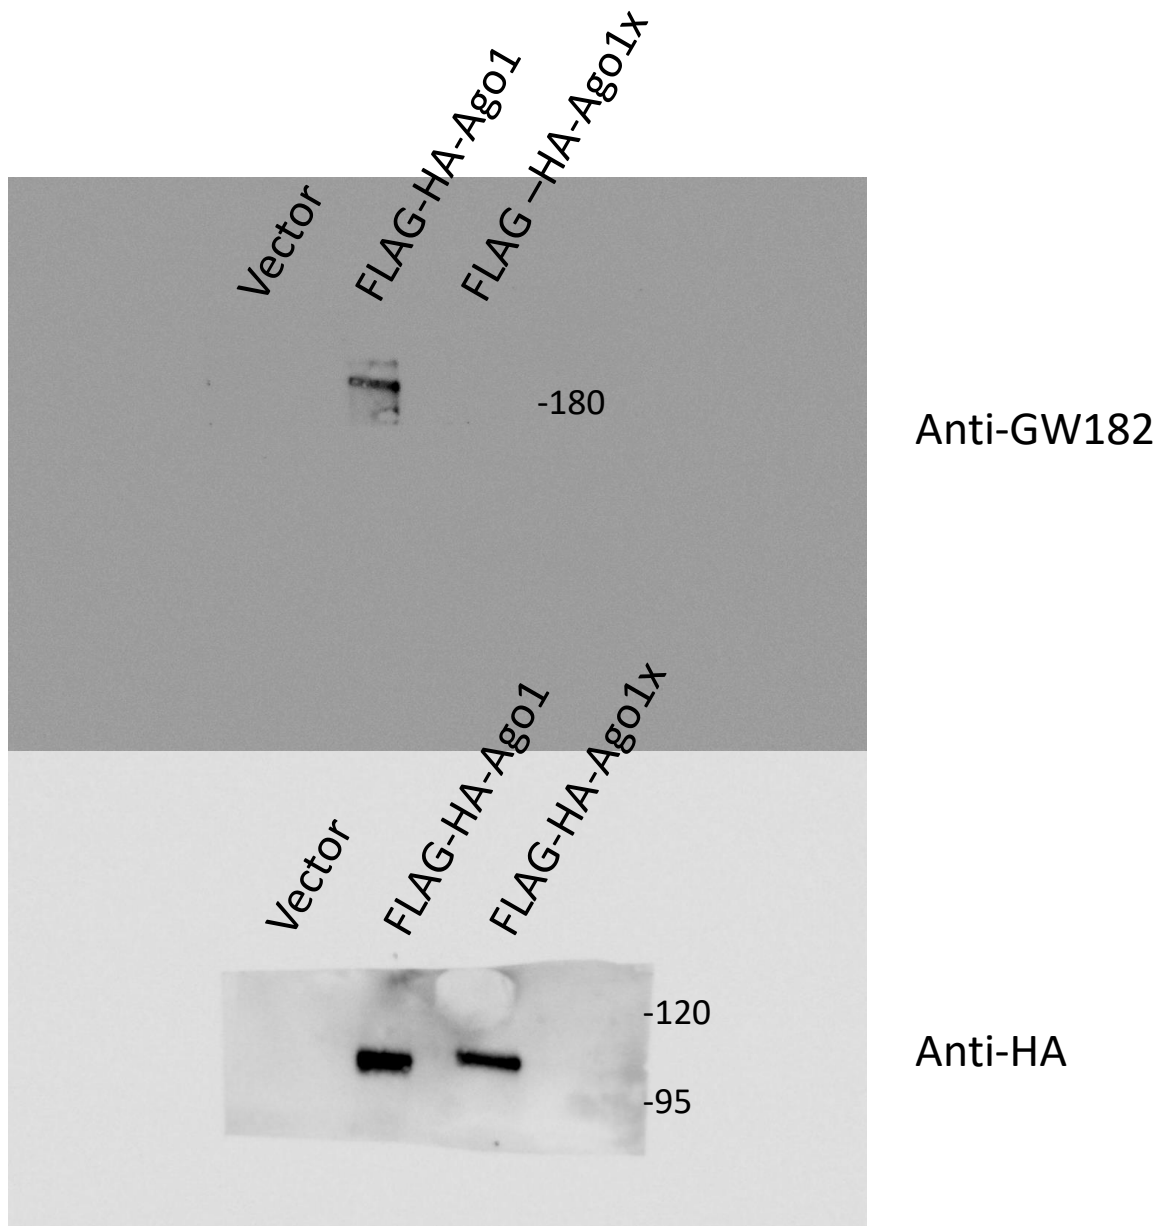

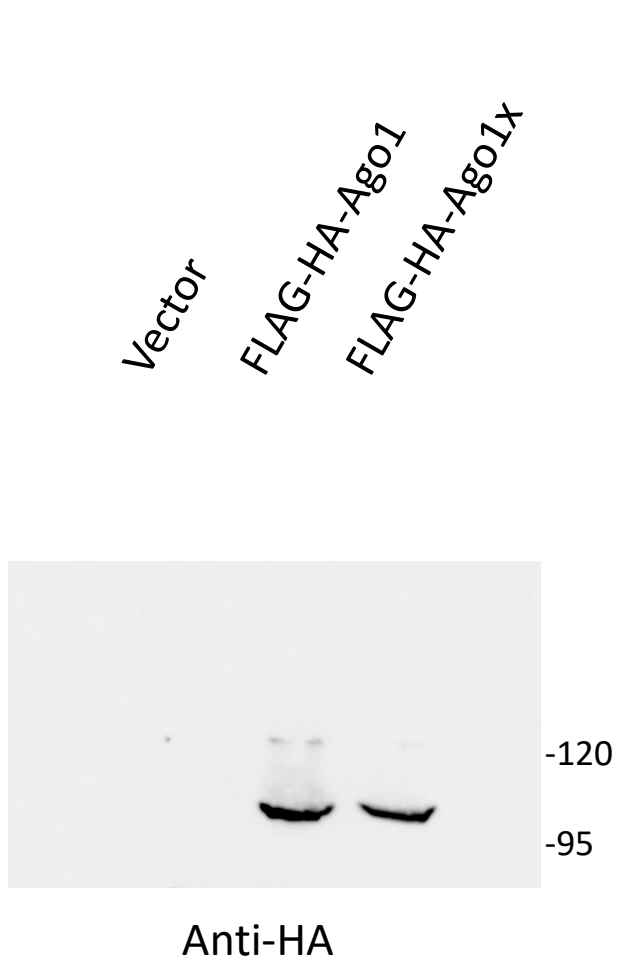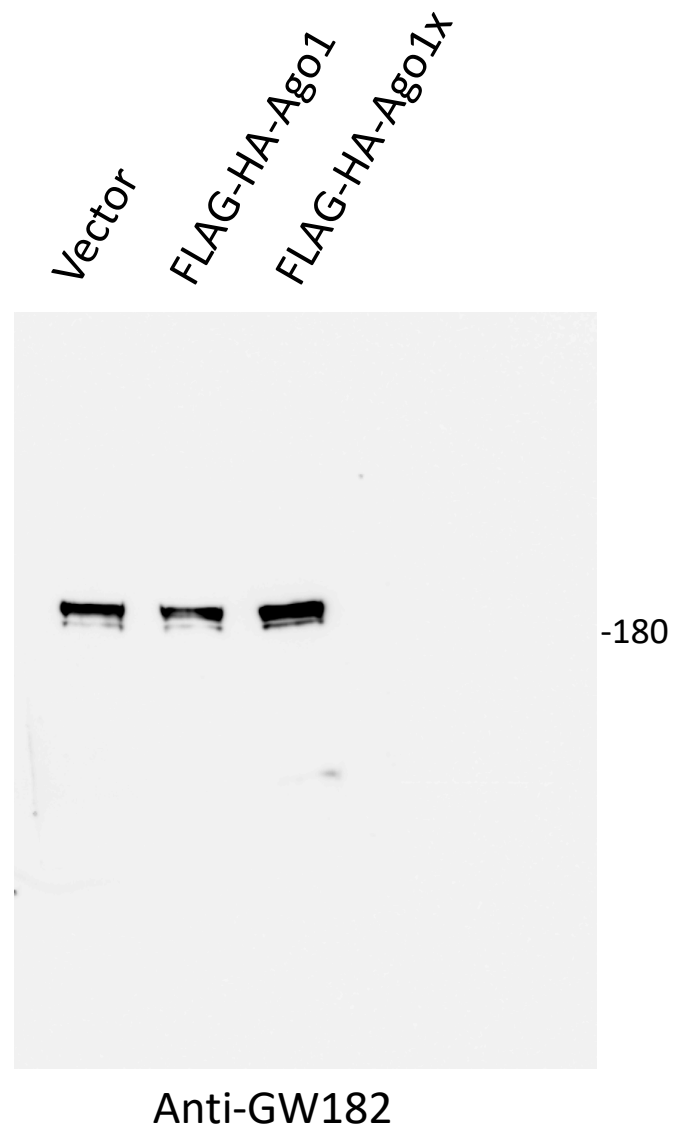

Supplement: EMBJ-38-e100727-s010.pdf [file EMBJ-38-e100727-s010.pdf]
