# Supplementary material for: Let‐7a‐regulated translational readthrough of mammalian AGO1 generates a microRNA pathway inhibitor
Source: PubMed Central journal article supplement (PMC6694283; doi:10.15252/embj.2018100727), 2019-07-22
Supplement: EMBJ-38-e100727-s011.pdf [file EMBJ-38-e100727-s011.pdf]

Fig 7B

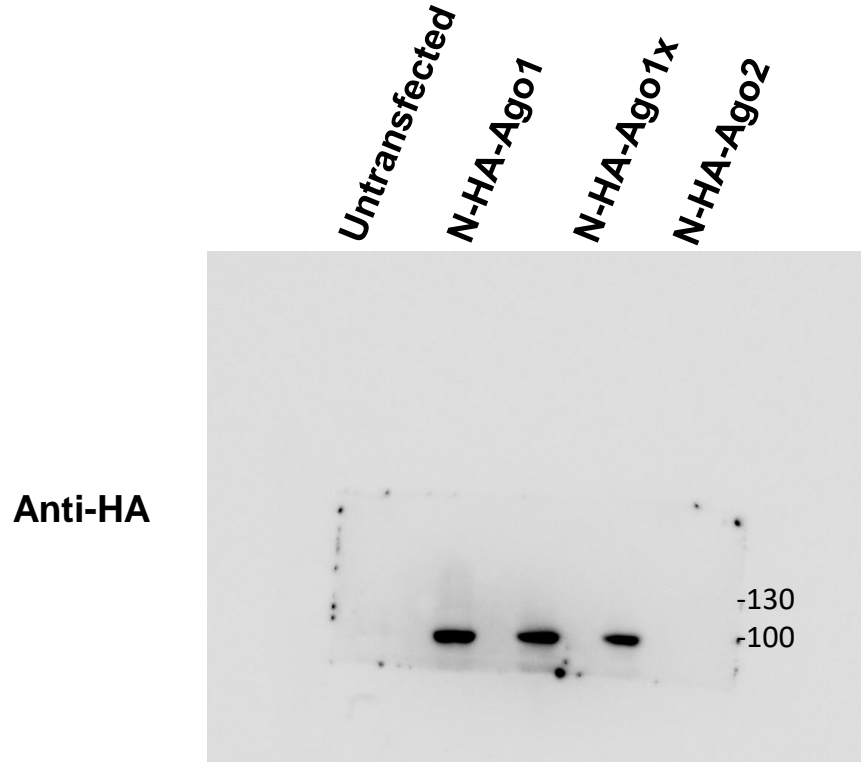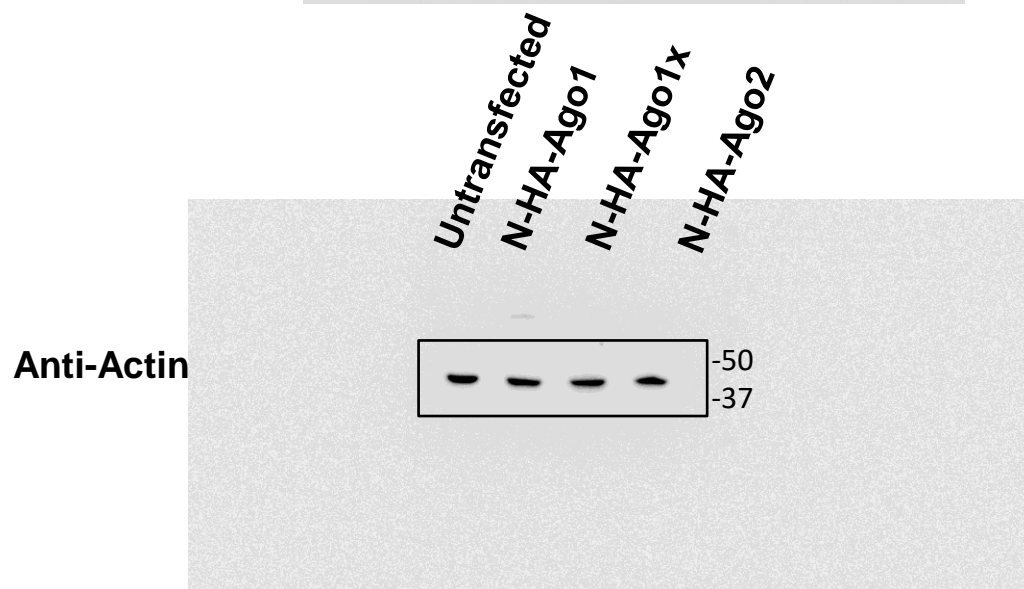

Fig 7C

Anti-HA

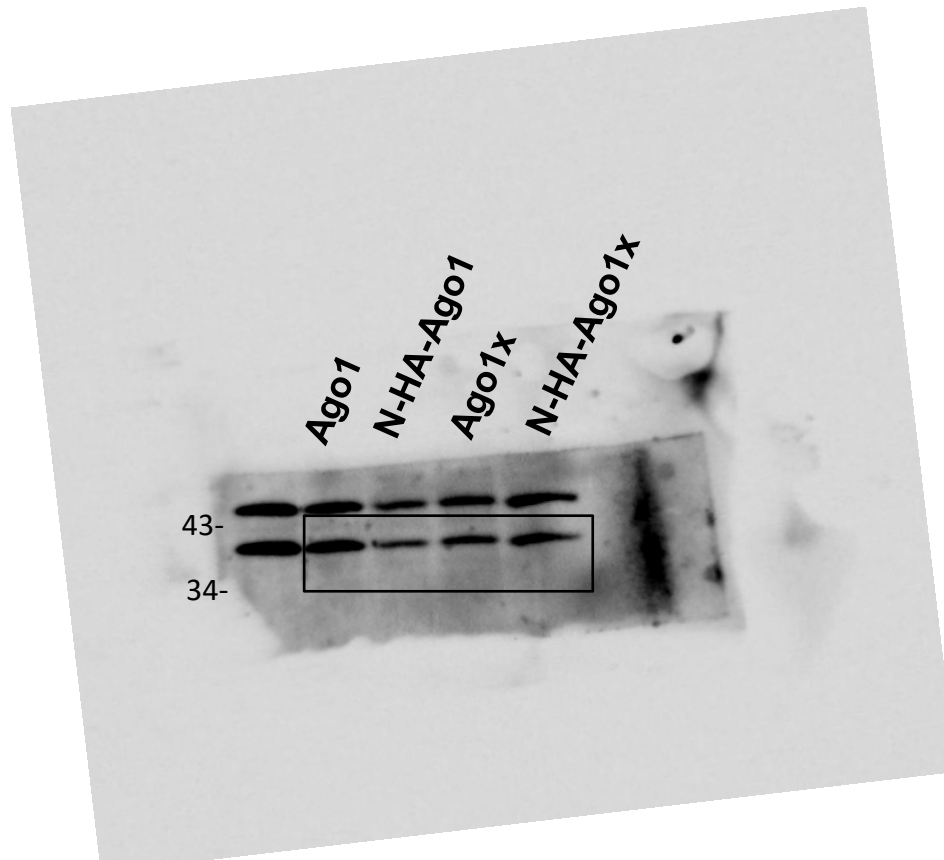

Anti-Actin

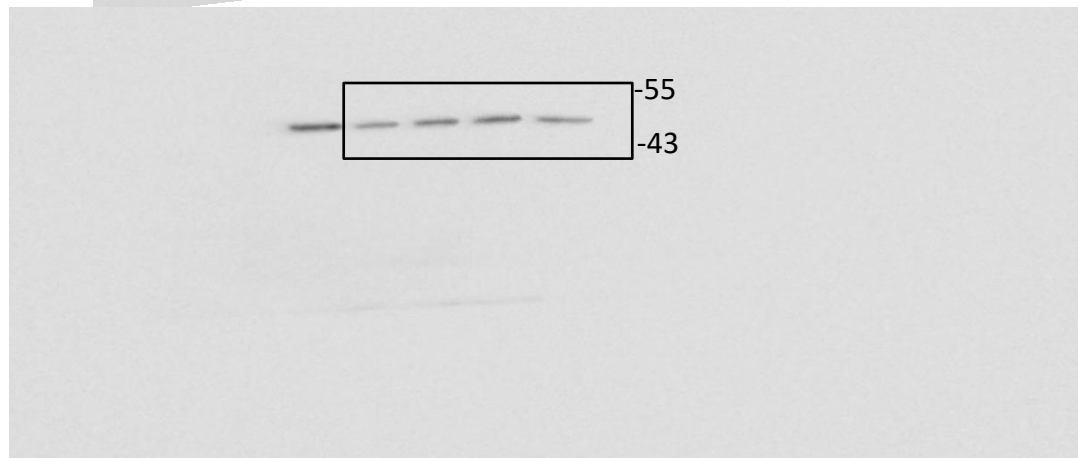

Fig 7C

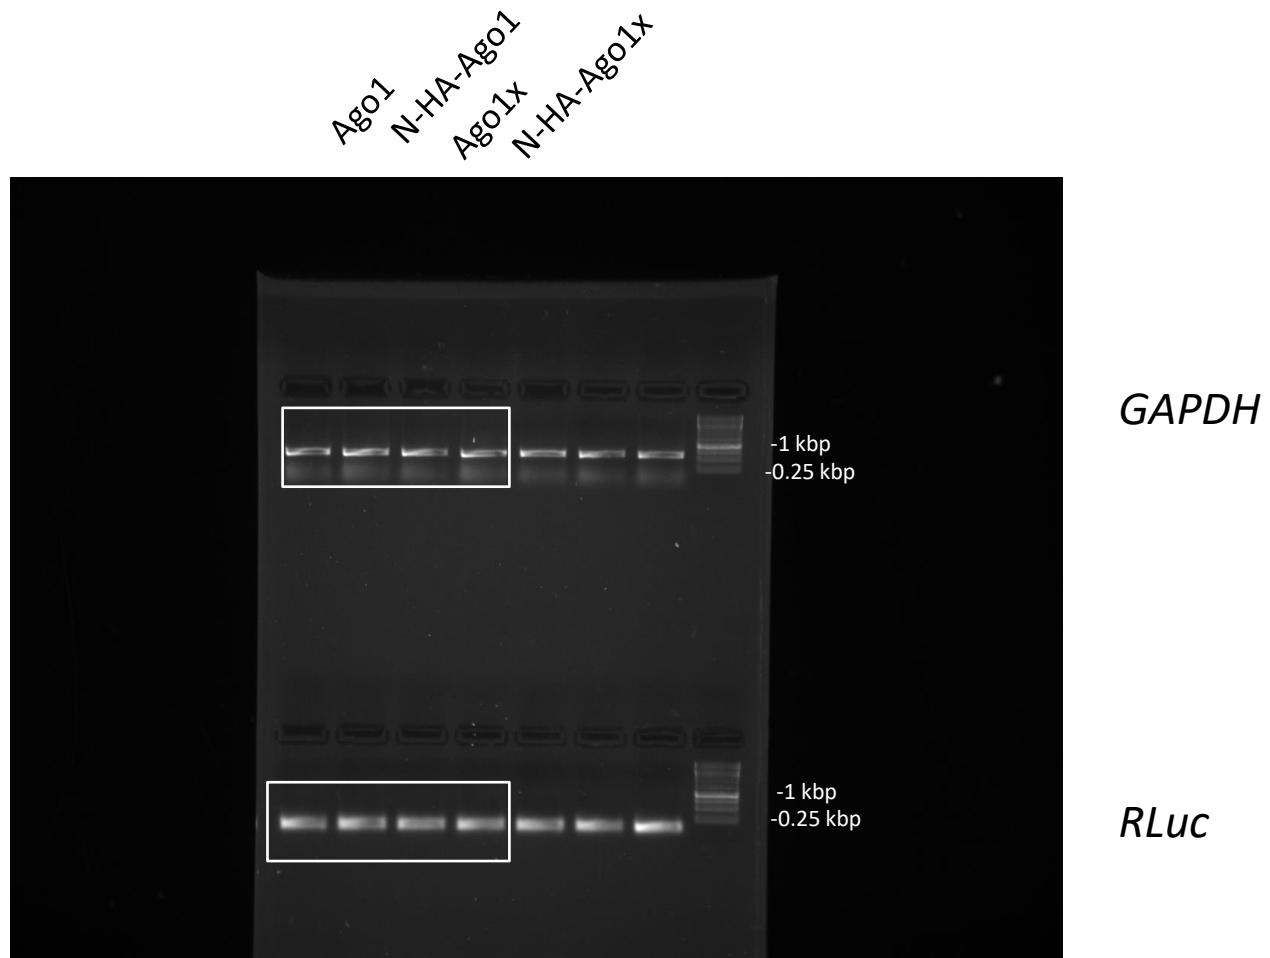

Fig 7D

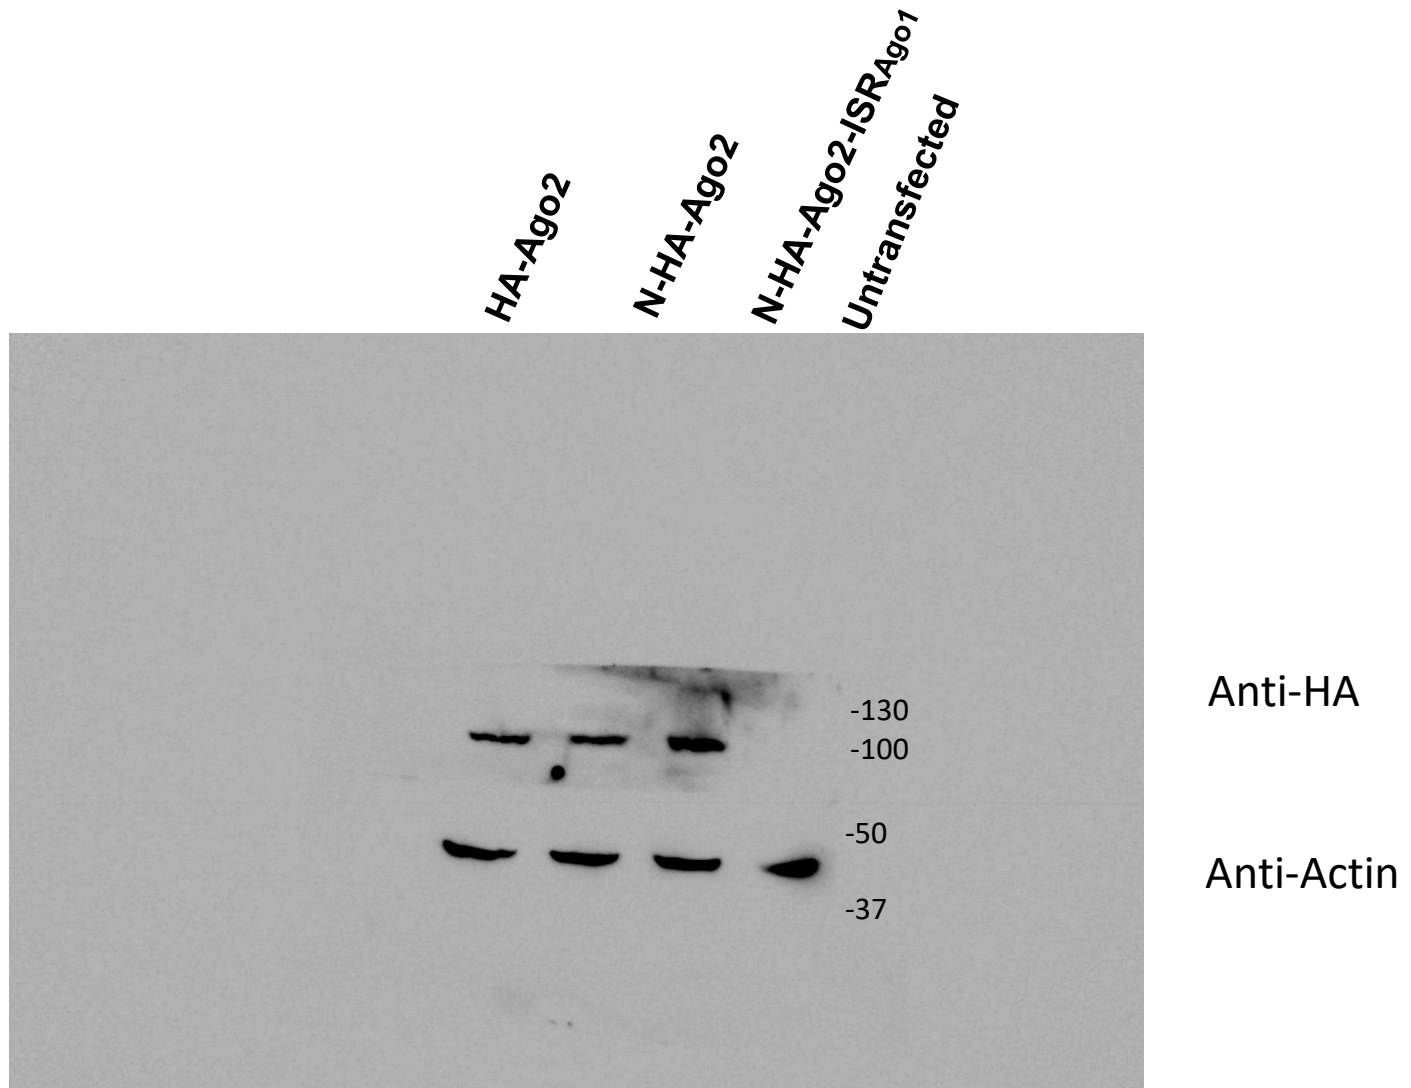





| <b>FIG_7_D</b>            |                  |                |            |                 |
|---------------------------|------------------|----------------|------------|-----------------|
|                           |                  |                |            |                 |
|                           | <b>Rluc/Fluc</b> | <b>Average</b> | <b>SEM</b> | <b>P-value:</b> |
| <b>N-HA-Ago2</b>          | 1278.195489      | 1424.241       | 92.6934    | <0.0001         |
|                           | 1596.153846      |                |            |                 |
|                           | 1398.373984      |                |            |                 |
| <b>N-HA-Ago2 ISR Ago1</b> | 3046.728972      | 3302.946       | 140.6308   | 0.0004          |
|                           | 3531.531532      |                |            |                 |
|                           | 3330.578512      |                |            |                 |
| <b>HA-Ago2</b>            | 3320.38835       | 3433.412       | 57.6039    |                 |
|                           | 3509.259259      |                |            |                 |
|                           | 3470.588235      |                |            |                 |
