# Supplementary material for: Let‐7a‐regulated translational readthrough of mammalian AGO1 generates a microRNA pathway inhibitor
Source: PubMed Central journal article supplement (PMC6694283; doi:10.15252/embj.2018100727), 2019-07-22
Supplement: EMBJ-38-e100727-s012.pdf [file EMBJ-38-e100727-s012.pdf]

Fig\_8A

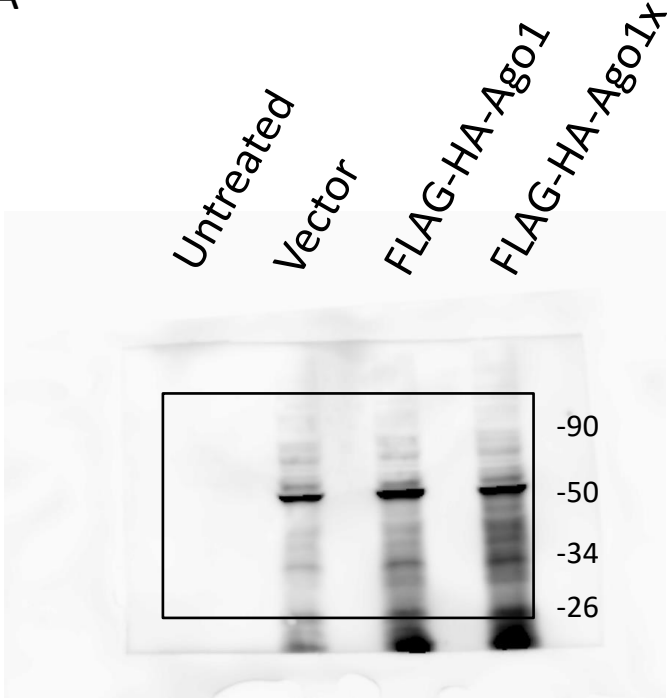

Anti- Puromycin

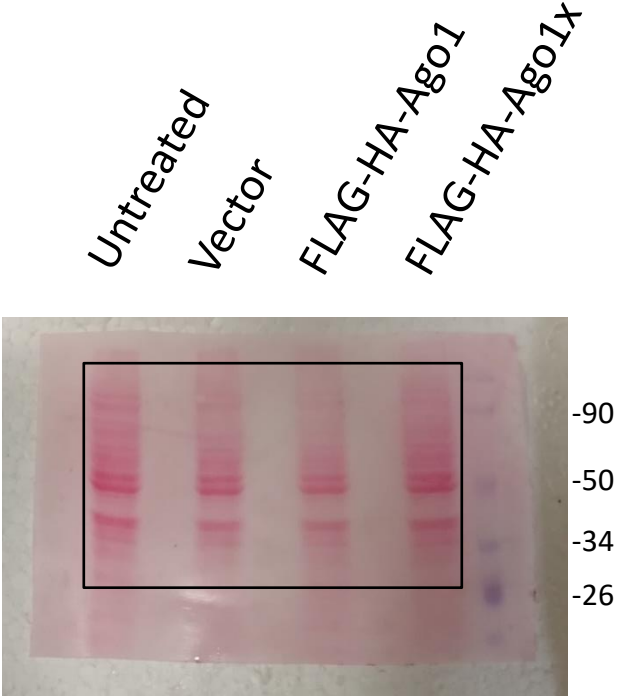

Ponceau S

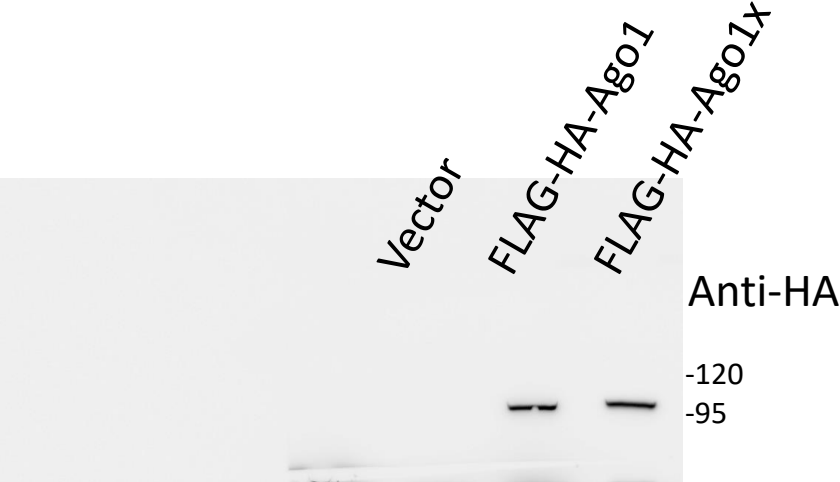

Anti-HA

Fig\_8B

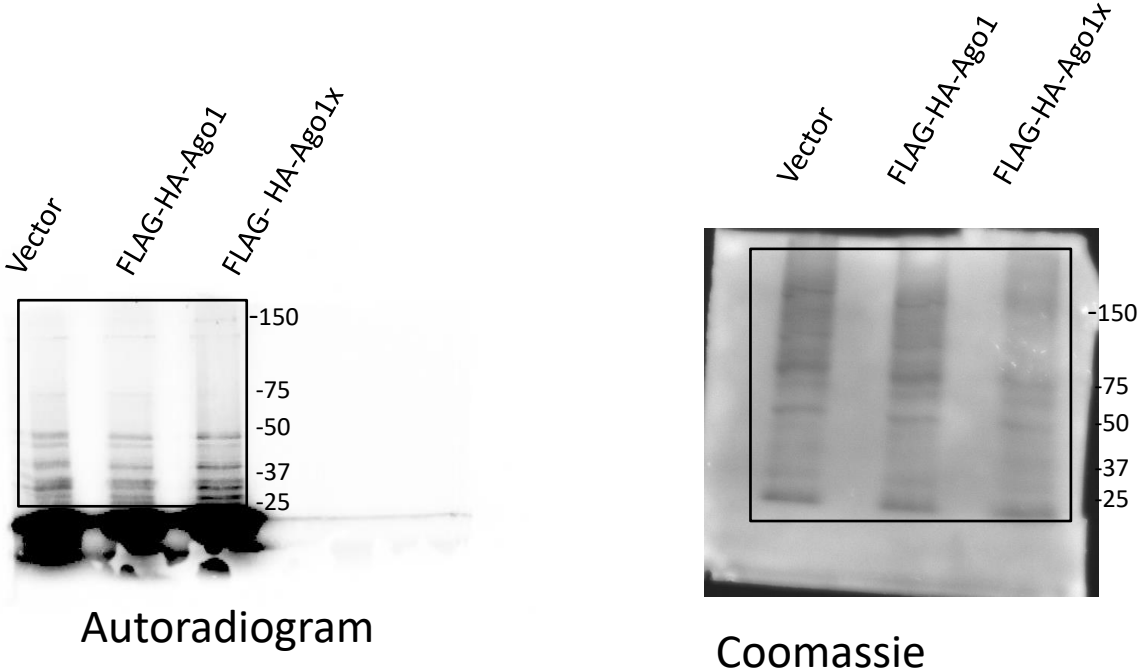

Autoradiogram

Coomassie

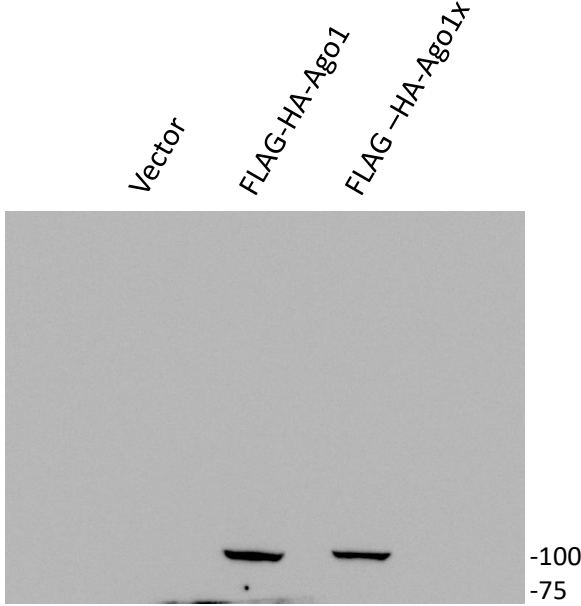

Anti-HA



| <b>FIG_8_B</b> |              |              |                |              |                   |            |
|----------------|--------------|--------------|----------------|--------------|-------------------|------------|
|                | <b>Rep-1</b> | <b>Rep-2</b> | <b>Rep-3</b>   | <b>Rep-4</b> | <b>Average</b>    | <b>SEM</b> |
| <b>Vector</b>  | 1            | 1            | 1              | 1            | 1                 | 0          |
| <b>AGO1</b>    | 1.17         | 1.1642       | 0.68           | 1.1611       | 1.0438            | 0.1213     |
| <b>AGO1x</b>   | 2.6          | 2.4066       | 2.48           | 2.4266       | 2.4783            | 0.0434     |
|                |              |              |                |              |                   |            |
|                |              |              | <b>P-value</b> | 0.029        | Mann-Whitney test |            |
|                |              |              |                |              |                   |            |
